# Supplementary material for: Accurate predictions of C–SO2R bond dissociation enthalpies using density functional theory methods
Source: Royal Society of Chemistry journal article supplement (doi:10.1039/c4cp02005g), 2014-01-01
Supplement: c4cp02005g1.pdf [file c4cp02005g1.pdf]

*Supporting Information*

**Accurate Predictions of C-SO<sub>2</sub>R Bond Dissociation  
Enthalpies with Density Functional Theory Methods**

*Hai-Zhu Yu,<sup>a</sup> Fang Fu,<sup>b</sup> Liang Zhang,<sup>a</sup> Yao Fu,<sup>b</sup> Zhimin Dang,<sup>\*a</sup> Jing Shi<sup>\*b</sup>*

<sup>a</sup>. Department of Polymer Science and Engineering, University of Science and Technology Beijing,  
Beijing 100083, China.

<sup>b</sup>. Department of Chemistry, University of Science and Technology of China, Hefei, 230026, China.

\*E-mail: [dangzm@ustb.edu.cn](mailto:dangzm@ustb.edu.cn); [shijing@ustc.edu.cn](mailto:shijing@ustc.edu.cn)

## Table of Contents

|                                                                                                        |     |
|--------------------------------------------------------------------------------------------------------|-----|
| Complete reference of Ref. (30).....                                                                   | S3  |
| Total electronic energies and thermal correction of enthalpy calculated with<br>different methods..... | S4  |
| Comparison between BDEs calculated by DFT/BS (DFT=M05-2X/M06-2X) and<br>the experimental results ..... | S29 |
| Cartesian coordinates of all species calculated at M06-2X/6-31G(d) method.....                         | S33 |

### **Complete reference of Ref. (30)**

Frisch, M. J.; Trucks, G. W.; Schlegel, H. B.; Scuseria, G. E.; Robb, M. A.; Cheeseman, J. R.; Scalmani, G.; Barone, V.; Mennucci, B.; Petersson, G. A.; Nakatsuji, H.; Caricato, M.; Li, X.; Hratchian, H. P.; Izmaylov, A. F.; Bloino, J.; Zheng, G.; Sonnenberg, J. L.; Hada, M.; Ehara, M.; Toyota, K.; Fukuda, R.; Hasegawa, J.; Ishida, M.; Nakajima, T.; Honda, Y.; Kitao, O.; Nakai, H.; Vreven, T.; Jr. Montgomery, J. A.; Peralta, J. E.; Ogliaro, F.; Bearpark, M.; Heyd, J. J.; Brothers, E.; Kudin, K. N.; Staroverov, V. N.; Keith, T.; Kobayashi, R.; Normand, J.; Raghavachari, K.; Rendell, A.; Burant, J. C.; Iyengar, S. S.; Tomasi, J.; Cossi, M.; Rega, N.; Millam, J. M.; Klene, M.; Knox, J. E.; Cross, J. B.; Bakken, V.; Adamo, C.; Jaramillo, J.; Gomperts, R.; Stratmann, R. E.; Yazyev, O.; Austin, A. J.; Cammi, R.; Pomelli, C.; Ochterski, J. W.; Martin, R. L.; Morokuma, K.; Zakrzewski, V. G.; Voth, G. A.; Salvador, P.; Dannenberg, J. J.; Dapprich, S.; Daniels, A. D.; Farkas, O.; Foresman, J. B.; Ortiz, J. V.; Cioslowski, J.; Fox, D. J. Gaussian 09, Revision B.01, Gaussian, Inc., Wallingford CT, 2010.

**Table 1:** Total electronic energies (**E**) and thermal correction of enthalpy (**TCE**) for all optimized geometries calculated at different methods (hartree).

(a) The calculation results with different functionals (DFT/(LanL2DZ/6-31G\*))

|                     | <b>B3LYP</b>   |            | <b>BB1K</b>    |            | <b>M05</b>     |            | <b>M05-2X</b>  |            |
|---------------------|----------------|------------|----------------|------------|----------------|------------|----------------|------------|
|                     | <b>E</b>       | <b>TCE</b> | <b>E</b>       | <b>TCE</b> | <b>E</b>       | <b>TCE</b> | <b>E</b>       | <b>TCE</b> |
| <b>1 (Me-SH)</b>    | -438.698348443 | 0.050950   | -438.691166498 | 0.049622   | -438.651461911 | 0.051704   | -438.654199930 | 0.050597   |
| <b>2 (Et-SH)</b>    | -478.012894316 | 0.081011   | -477.980002038 | 0.078247   | -477.932130169 | 0.081990   | -477.961862279 | 0.081345   |
| <b>3 (nPr-SH)</b>   | -517.326695121 | 0.110986   | -517.268025235 | 0.106871   | -517.211979045 | 0.112083   | -517.269822355 | 0.112600   |
| <b>4 (iPr-SH)</b>   | -517.328818890 | 0.110457   | -517.270676632 | 0.106216   | -517.214373513 | 0.111744   | -517.272343688 | 0.112106   |
| <b>5 (tBu-SH)</b>   | -556.643016413 | 0.139665   | -556.559445633 | 0.134002   | -556.494668891 | 0.141439   | -556.582776733 | 0.140502   |
| <b>6 (cypen-SH)</b> | -594.742320077 | 0.148598   | -594.651560961 | 0.144915   | -594.571306126 | 0.150583   | -594.683419248 | 0.150845   |
| <b>7 (Ph-SH)</b>    | -630.434123019 | 0.106837   | -630.371025519 | 0.104690   | -630.240396046 | 0.107857   | -630.379503400 | 0.108589   |
| <b>8 (Bn-SH)</b>    | -669.748056289 | 0.136939   | -669.657680888 | 0.132538   | -669.519229375 | 0.138197   | -669.686544384 | 0.139589   |
| <b>9 (MeCO-SH)</b>  | -552.034945091 | 0.062381   | -552.019854753 | 0.060861   | -551.940860371 | 0.063218   | -551.977951575 | 0.062286   |
| <b>10 (MeS-Me)</b>  | -478.013808509 | 0.082155   | -477.981532953 | 0.079328   | -477.933487323 | 0.082912   | -477.963248448 | 0.083657   |
| <b>11 (MeS-Et)</b>  | -517.328220465 | 0.112340   | -517.270349868 | 0.108020   | -517.213910162 | 0.113029   | -517.270867359 | 0.113947   |
| <b>12 (MeS-nPr)</b> | -556.641951071 | 0.142347   | -556.558220014 | 0.136833   | -556.493763226 | 0.143566   | -556.577619103 | 0.144709   |
| <b>13 (nPrS-</b>    | -635.270028742 | 0.202479   | -635.134840061 | 0.193296   | -635.053977752 | 0.204212   | -635.191932136 | 0.204825   |

|                                      |                |          |                |          |                |          |                |          |
|--------------------------------------|----------------|----------|----------------|----------|----------------|----------|----------------|----------|
| <b><sup>n</sup>Pr)</b>               |                |          |                |          |                |          |                |          |
| <b>14(MeS-<sup>t</sup>Bu)</b>        | -595.955880857 | 0.171055 | -595.847707584 | 0.165026 | -595.774037174 | 0.172241 | -595.889980479 | 0.172595 |
| <b>15 (MeS-Ph)</b>                   | -669.749374306 | 0.138350 | -669.661662293 | 0.134645 | -669.522089258 | 0.139155 | -669.688790444 | 0.139842 |
| <b>16 (MeS-Bn)</b>                   | -709.064559198 | 0.168263 | -708.949740106 | 0.163323 | -708.802824816 | 0.169365 | -708.998050748 | 0.171043 |
| <b>17 (EtS-<sup>t</sup>Bu)</b>       | -635.269929933 | 0.201303 | -635.136124245 | 0.193851 | -635.054007158 | 0.203002 | -635.197209058 | 0.203102 |
| <b>18 (EtS-<br/>COMe)</b>            | -630.668974178 | 0.123969 | -630.602639504 | 0.119916 | -630.505902255 | 0.123953 | -630.597960245 | 0.125067 |
| <b>19 (MeSS-<br/>Me)</b>             | -876.207532741 | 0.085425 | -876.200633282 | 0.081851 | -876.128247251 | 0.086027 | -876.132704745 | 0.086809 |
| <b>20 (MeSS-<br/>Et)</b>             | -915.522472604 | 0.115614 | -915.499720741 | 0.111492 | -915.409283696 | 0.116556 | -915.440902966 | 0.117531 |
| <b>21 (MeSS-<br/><sup>i</sup>Pr)</b> | -954.838150254 | 0.145090 | -954.790414115 | 0.139585 | -954.691427414 | 0.146423 | -954.751656573 | 0.147387 |
| <b>22 (MeSO<sub>2</sub>-<br/>Me)</b> | -628.400812804 | 0.092823 | -628.370848925 | 0.090129 | -628.283415530 | 0.094012 | -628.333396666 | 0.094590 |
| <b>23 (MeSO<sub>2</sub>-<br/>Et)</b> | -667.716745296 | 0.123056 | -667.661296783 | 0.119112 | -667.565293187 | 0.124428 | -667.642963605 | 0.124984 |

|                                                  |                |          |                   |          |                |          |                |          |
|--------------------------------------------------|----------------|----------|-------------------|----------|----------------|----------|----------------|----------|
| <b>24 (MeSO<sub>2</sub>-<br/>iPr)</b>            | -707.032189149 | 0.152761 | -706.951732708    | 0.147424 | -706.846909596 | 0.154456 | -706.954180800 | 0.155163 |
| <b>25 (MeSO<sub>2</sub>-<br/><sup>n</sup>Bu)</b> | -746.344483383 | 0.183114 | -746.237411343    | 0.175441 | -746.125154420 | 0.185146 | -746.256976463 | 0.186218 |
| <b>26 (MeSO<sub>2</sub>-<br/>Ph)</b>             | -820.135508051 | 0.149103 | -820.048624442    | 0.144794 | -819.869878688 | 0.150245 | -820.058427622 | 0.151680 |
| <b>27 (MeSO<sub>2</sub>-<br/>Bn)</b>             | -859.451312384 | 0.178879 | -859.338517566    | 0.173328 | -859.151727765 | 0.180347 | -859.367103138 | 0.181984 |
| <b>Me•</b>                                       | -39.8382917656 | 0.033905 | -39.7993848530    | 0.033654 | -39.7956251843 | 0.034230 | -39.8198821518 | 0.034437 |
| <b>•SH</b>                                       | -398.740027881 | 0.009402 | -398.759497296    | 0.009621 | -398.730310504 | 0.009698 | -398.705508349 | 0.009554 |
| <b>Et•</b>                                       | -79.1578681142 | 0.064549 | -79.0947942334    | 0.062830 | -79.0820057398 | 0.065123 | -79.1305257956 | 0.065521 |
| <b>nPr•</b>                                      | -118.471371530 | 0.094600 | -118.382522247    | 0.091408 | -118.361425406 | 0.095403 | -118.436582794 | 0.095571 |
| <b>iPr•</b>                                      | -118.478152840 | 0.094688 | -118.390557834    | 0.091548 | -118.369148704 | 0.095405 | -118.442560844 | 0.096215 |
| <b>nBu•</b>                                      | -157.785287244 | 0.124554 | -157.670692795    | 0.120004 | -157.641059144 | 0.124605 | -157.743646095 | 0.125605 |
| <b>tBu•</b>                                      | -157.798308907 | 0.124587 | -157.686007271    | 0.120177 | -157.655874089 | 0.125746 | -157.755412114 | 0.126550 |
| <b>Cypen•</b>                                    | -195.894857002 | 0.132605 | -195.775051402    | 0.129678 | -195.729217633 | 0.134040 | -195.857287888 | 0.134620 |
| <b>Ph•</b>                                       | -231.561280845 | 0.092941 | -231.469155922    | 0.091567 | -231.372606315 | 0.093266 | -231.529714200 | 0.094536 |
| <b>Bn•</b>                                       | -270.915143408 | 0.121567 | -270.796889402    | 0.120032 | -270.692116431 | 0.122172 | -270.876008423 | 0.123507 |
| <b>MeCO•</b>                                     | -153.179838224 | 0.048316 | -153.135546311    | 0.046953 | -153.086198799 | 0.048670 | -153.148118855 | 0.049107 |
| <b>MeS•</b>                                      | -438.059669071 | 0.038752 | -438.055673888964 | 0.038373 | -438.016347272 | 0.040859 | -438.017677017 | 0.039141 |
| <b>nPrS•</b>                                     | -516.689192760 | 0.100331 | -516.634328875    | 0.096929 | -516.578143247 | 0.101373 | -516.633461838 | 0.101933 |
| <b>EtS•</b>                                      | -477.375148104 | 0.070365 | -477.345784126    | 0.068278 | -477.298035441 | 0.071406 | -477.325894282 | 0.071419 |

|                          |                |            |                |            |                |            |                |            |
|--------------------------|----------------|------------|----------------|------------|----------------|------------|----------------|------------|
| <b>MeSS•</b>             | -836.277628436 | 0.044855   | -836.313282136 | 0.043479   | -836.234976173 | 0.045235   | -836.210661405 | 0.045660   |
| <b>MeSO<sub>2</sub>•</b> | -588.460138869 | 0.050985   | -588.466646812 | 0.049962   | -588.373462950 | 0.051767   | -588.395035945 | 0.052058   |
|                          | <b>M06</b>     |            | <b>M06-2X</b>  |            | <b>M06-L</b>   |            | <b>MPW1K</b>   |            |
|                          | <b>E</b>       | <b>TCE</b> | <b>E</b>       | <b>TCE</b> | <b>E</b>       | <b>TCE</b> | <b>E</b>       | <b>TCE</b> |
| <b>1 (Me-SH)</b>         | -438.623457793 | 0.050757   | -438.627397902 | 0.050328   | -438.664288735 | 0.051192   | -438.687295140 | 0.049819   |
| <b>2 (Et-SH)</b>         | -477.905908566 | 0.080554   | -477.920853305 | 0.080774   | -477.970946684 | 0.081203   | -477.992076409 | 0.078631   |
| <b>3 (nPr-SH)</b>        | -517.185591755 | 0.110264   | -517.213652492 | 0.111736   | -517.277046706 | 0.111312   | -517.296024440 | 0.107409   |
| <b>4 (iPr-SH)</b>        | -517.189641858 | 0.109809   | -517.217199566 | 0.111368   | -517.280296644 | 0.110699   | -517.298635460 | 0.106776   |
| <b>5 (tBu-SH)</b>        | -556.474383195 | 0.139124   | -556.513294568 | 0.139656   | -556.588930672 | 0.140042   | -556.603244790 | 0.134731   |
| <b>6 (cypen-SH)</b>      | -594.545758115 | 0.147858   | -594.600859351 | 0.149868   | -594.683724255 | 0.149047   | -594.701035951 | 0.145700   |
| <b>7 (Ph-SH)</b>         | -630.212567901 | 0.106503   | -630.288473046 | 0.107835   | -630.377822957 | 0.106668   | -630.399251310 | 0.105217   |
| <b>8 (Bn-SH)</b>         | -669.493371554 | 0.136294   | -669.581377336 | 0.138581   | -669.682451184 | 0.136879   | -669.702105663 | 0.133164   |
| <b>9 (MeCO-SH)</b>       | -551.906833319 | 0.062395   | -551.922730850 | 0.061969   | -551.996094424 | 0.062764   | -552.018603021 | 0.061152   |
| <b>10 (MeS-Me)</b>       | -477.905223482 | 0.081552   | -477.921863742 | 0.082971   | -477.971311701 | 0.082043   | -477.993586892 | 0.079723   |
| <b>11 (MeS-Et)</b>       | -517.186933534 | 0.111461   | -517.215474331 | 0.113012   | -517.278440084 | 0.112310   | -517.298196430 | 0.108588   |
| <b>12 (MeS-nPr)</b>      | -556.467291123 | 0.141376   | -556.508048724 | 0.143599   | -556.583962390 | 0.142441   | -556.602126027 | 0.137533   |
| <b>13 (nPrS-</b>         | -635.029300428 | 0.201130   | -635.094106421 | 0.204208   | -635.196514190 | 0.202635   | -635.210603594 | 0.194325   |

|                                      |                |          |                |          |                |          |                |          |
|--------------------------------------|----------------|----------|----------------|----------|----------------|----------|----------------|----------|
| <b><sup>n</sup>Pr)</b>               |                |          |                |          |                |          |                |          |
| <b>14(MeS-<sup>t</sup>Bu)</b>        | -595.754625306 | 0.168922 | -595.806239053 | 0.171364 | -595.894915285 | 0.170309 | -595.907000905 | 0.164874 |
| <b>15 (MeS-Ph)</b>                   | -669.494433645 | 0.137753 | -669.583367572 | 0.139633 | -669.685660300 | 0.138199 | -669.705507668 | 0.135400 |
| <b>16 (MeS-Bn)</b>                   | -708.777842366 | 0.167180 | -708.878423399 | 0.169578 | -708.992440920 | 0.168139 | -709.009855557 | 0.164114 |
| <b>17 (EtS-<sup>t</sup>Bu)</b>       | -635.035643621 | 0.200105 | -635.099318468 | 0.203043 | -635.201126218 | 0.201542 | -635.211311216 | 0.194846 |
| <b>18 (EtS-<br/>COMe)</b>            | -630.472715963 | 0.123320 | -630.513592563 | 0.125092 | -630.615200495 | 0.124350 | -630.632820764 | 0.120387 |
| <b>19 (MeSS-<br/>Me)</b>             | -876.070418301 | 0.084790 | -876.080401691 | 0.086157 | -876.146756319 | 0.085418 | -876.194998289 | 0.082102 |
| <b>20 (MeSS-<br/>Et)</b>             | -915.352470380 | 0.114895 | -915.374377494 | 0.116745 | -915.455394901 | 0.115531 | -915.500262419 | 0.111078 |
| <b>21 (MeSS-<br/><sup>i</sup>Pr)</b> | -954.637559831 | 0.144305 | -954.671079503 | 0.146453 | -954.763964636 | 0.145211 | -954.806639144 | 0.139309 |
| <b>22 (MeSO<sub>2</sub>-<br/>Me)</b> | -628.241127582 | 0.092551 | -628.254533646 | 0.093919 | -628.361925602 | 0.092746 | -628.379726191 | 0.090581 |
| <b>23 (MeSO<sub>2</sub>-<br/>Et)</b> | -667.524954097 | 0.122570 | -667.550085301 | 0.124213 | -667.670718647 | 0.123164 | -667.685915268 | 0.119653 |



|                                       |                |          |                |          |                |          |                |          |
|---------------------------------------|----------------|----------|----------------|----------|----------------|----------|----------------|----------|
| <b>24 (MeSO<sub>2</sub>-<br/>iPr)</b> | -706.809405315 | 0.151693 | -706.847146147 | 0.154129 | -706.980394771 | 0.152867 | -706.991892318 | 0.148172 |
| <b>25 (MeSO<sub>2</sub>-<br/>nBu)</b> | -746.086360859 | 0.182202 | -746.135891502 | 0.184850 | -746.282797527 | 0.183264 | -746.293914581 | 0.176401 |
| <b>26 (MeSO<sub>2</sub>-<br/>Ph)</b>  | -819.829648513 | 0.148450 | -819.915457996 | 0.150509 | -820.073678491 | 0.149112 | -820.089522005 | 0.145480 |
| <b>27 (MeSO<sub>2</sub>-<br/>Bn)</b>  | -859.112926939 | 0.178142 | -859.210218349 | 0.180694 | -859.382231792 | 0.178947 | -859.395467965 | 0.174128 |
| <b>Me•</b>                            | -39.7954260081 | 0.033400 | -39.8042299171 | 0.034094 | -39.8243893128 | 0.032497 | -39.8224638632 | 0.033836 |
| <b>•SH</b>                            | -398.700827054 | 0.009461 | -398.693941321 | 0.009614 | -398.712695757 | 0.009549 | -398.737853015 | 0.009648 |
| <b>Et•</b>                            | -79.0811744849 | 0.063149 | -79.1005060515 | 0.065071 | -79.1365541996 | 0.064581 | -79.1328009889 | 0.063204 |
| <b>nPr•</b>                           | -118.361147487 | 0.093935 | -118.392651695 | 0.094919 | -118.441927607 | 0.094721 | -118.436412943 | 0.091942 |
| <b>iPr•</b>                           | -118.368422240 | 0.094186 | -118.398565891 | 0.095588 | -118.449826803 | 0.094866 | -118.443812605 | 0.092104 |
| <b>nBu•</b>                           | -157.642100200 | 0.123740 | -157.685630091 | 0.125661 | -157.748180119 | 0.124733 | -157.740496238 | 0.120723 |
| <b>tBu•</b>                           | -157.656506847 | 0.123953 | -157.697655052 | 0.125839 | -157.763609445 | 0.124941 | -157.754689347 | 0.120891 |
| <b>Cypen•</b>                         | -195.728496335 | 0.132031 | -195.785682657 | 0.133788 | -195.856828883 | 0.133198 | -195.849559252 | 0.130450 |
| <b>Ph•</b>                            | -231.372444967 | 0.092535 | -231.451696612 | 0.093871 | -231.526995424 | 0.092870 | -231.522186368 | 0.092145 |
| <b>Bn•</b>                            | -270.690933038 | 0.120777 | -270.779420791 | 0.122341 | -270.869364660 | 0.121199 | -270.865444033 | 0.120521 |
| <b>MeCO•</b>                          | -153.079320742 | 0.048088 | -153.103720484 | 0.048754 | -153.157240268 | 0.048369 | -153.157081718 | 0.047196 |
| <b>MeS•</b>                           | -437.985815725 | 0.040173 | -437.990899469 | 0.042055 | -438.024107742 | 0.038276 | -438.049257541 | 0.038608 |
| <b>nPrS•</b>                          | -516.548976977 | 0.099814 | -516.578646052 | 0.102843 | -516.638888239 | 0.100298 | -516.659441984 | 0.097409 |
| <b>EtS•</b>                           | -477.267975514 | 0.070273 | -477.284991710 | 0.072691 | -477.331689298 | 0.070453 | -477.355227037 | 0.068688 |

|                          |                |            |                |            |                |            |                |            |
|--------------------------|----------------|------------|----------------|------------|----------------|------------|----------------|------------|
| <b>MeSS•</b>             | -836.173634715 | 0.044536   | -836.171603676 | 0.045179   | -836.225247322 | 0.044772   | -836.277389475 | 0.043692   |
| <b>MeSO<sub>2</sub>•</b> | -588.329732220 | 0.050856   | -588.331588099 | 0.051670   | -588.427985025 | 0.051101   | -588.454033964 | 0.050200   |
|                          | <b>MPW3LYP</b> |            | <b>MPWB1K</b>  |            | <b>PBE</b>     |            | <b>TPSS</b>    |            |
|                          | <b>E</b>       | <b>TCE</b> | <b>E</b>       | <b>TCE</b> | <b>E</b>       | <b>TCE</b> | <b>E</b>       | <b>TCE</b> |
| <b>1 (Me-SH)</b>         | -438.645990382 | 0.049147   | -438.695005307 | 0.049667   | -438.441836811 | 0.049877   | -438.710017505 | 0.050620   |
| <b>2 (Et-SH)</b>         | -477.931651099 | 0.078644   | -477.983048684 | 0.078307   | -477.698939962 | 0.079259   | -478.030661308 | 0.080412   |
| <b>3 (nPr-SH)</b>        | -517.216577877 | 0.107155   | -517.270312540 | 0.106941   | -516.955211108 | 0.108475   | -517.350439902 | 0.109967   |
| <b>4 (iPr-SH)</b>        | -517.219049314 | 0.107507   | -517.273219144 | 0.106291   | -516.958129264 | 0.107958   | -517.352820974 | 0.109438   |
| <b>5 (tBu-SH)</b>        | -556.504492839 | 0.136213   | -556.561681529 | 0.134099   | -556.215530455 | 0.136479   | -556.673218427 | 0.138304   |
| <b>6 (cypen-SH)</b>      | -594.587976769 | 0.144082   | -594.653663694 | 0.144062   | -594.272237418 | 0.145109   | -594.781810915 | 0.146915   |
| <b>7 (Ph-SH)</b>         | -630.303841316 | 0.104054   | -630.373717053 | 0.104780   | -629.939961928 | 0.104401   | -630.483577835 | 0.105590   |
| <b>8 (Bn-SH)</b>         | -669.588650084 | 0.132633   | -669.659473239 | 0.132630   | -669.195111794 | 0.133743   | -669.802665999 | 0.135316   |
| <b>9 (MeCO-SH)</b>       | -551.967538878 | 0.060402   | -552.023758831 | 0.060900   | -551.665443134 | 0.060042   | -552.064375040 | 0.060787   |
| <b>10 (MeS-Me)</b>       | -477.933022516 | 0.078838   | -477.984454611 | 0.079385   | -477.700257241 | 0.080317   | -478.032931778 | 0.081538   |
| <b>11 (MeS-Et)</b>       | -517.218582346 | 0.108412   | -517.272617344 | 0.108055   | -516.957337035 | 0.109685   | -517.353390619 | 0.111268   |
| <b>12 (MeS-nPr)</b>      | -556.503412443 | 0.137996   | -556.559589413 | 0.136923   | -556.213430697 | 0.139102   | -556.673191401 | 0.141067   |
| <b>13 (nPrS-</b>         | -635.073740078 | 0.196131   | -635.134649969 | 0.193415   | -634.726543268 | 0.197820   | -635.313391893 | 0.200512   |

|                                      |                |          |                |          |                |          |                |          |
|--------------------------------------|----------------|----------|----------------|----------|----------------|----------|----------------|----------|
| <b><sup>n</sup>Pr)</b>               |                |          |                |          |                |          |                |          |
| <b>14(MeS-<sup>t</sup>Bu)</b>        | -595.789171260 | 0.166143 | -595.849323703 | 0.165192 | -595.471715462 | 0.167053 | -595.993788714 | 0.169336 |
| <b>15 (MeS-Ph)</b>                   | -669.590794222 | 0.134026 | -669.663569648 | 0.134708 | -669.198512475 | 0.135139 | -669.806591481 | 0.136777 |
| <b>16 (MeS-Bn)</b>                   | -708.876883280 | 0.162502 | -708.950926267 | 0.163367 | -708.455321318 | 0.164331 | -709.127097603 | 0.166363 |
| <b>17 (EtS-<sup>t</sup>Bu)</b>       | -635.074394930 | 0.194903 | -635.136941608 | 0.194022 | -634.728340797 | 0.196603 | -635.314028193 | 0.199219 |
| <b>18 (EtS-<br/>COMe)</b>            | -630.543367211 | 0.119077 | -630.604822071 | 0.119999 | -630.185579743 | 0.121122 | -630.712645853 | 0.122713 |
| <b>19 (MeSS-<br/>Me)</b>             | -876.119950869 | 0.082093 | -876.221344098 | 0.081788 | -875.712588471 | 0.083513 | -876.235506761 | 0.084739 |
| <b>20 (MeSS-<br/>Et)</b>             | -915.406031912 | 0.110795 | -915.509926050 | 0.111559 | -914.970177278 | 0.113000 | -915.556673033 | 0.114588 |
| <b>21 (MeSS-<br/><sup>i</sup>Pr)</b> | -954.693185024 | 0.139722 | -954.800243222 | 0.138749 | -954.229332102 | 0.141788 | -954.878733959 | 0.143754 |
| <b>22 (MeSO<sub>2</sub>-<br/>Me)</b> | -628.311705388 | 0.089378 | -628.374829885 | 0.090213 | -627.956879938 | 0.090605 | -628.444497572 | 0.091839 |
| <b>23 (MeSO<sub>2</sub>-<br/>Et)</b> | -667.598959703 | 0.118147 | -667.664774327 | 0.119206 | -667.215514765 | 0.120093 | -667.766675682 | 0.121746 |

|                                                  |                |          |                |          |                |          |                |          |
|--------------------------------------------------|----------------|----------|----------------|----------|----------------|----------|----------------|----------|
| <b>24 (MeSO<sub>2</sub>-<br/>iPr)</b>            | -706.886013794 | 0.147341 | -706.954882985 | 0.147535 | -706.474330861 | 0.149122 | -707.088575050 | 0.151065 |
| <b>25 (MeSO<sub>2</sub>-<br/><sup>n</sup>Bu)</b> | -746.168966090 | 0.177200 | -746.239259543 | 0.175554 | -745.728120483 | 0.178782 | -746.406374407 | 0.181135 |
| <b>26 (MeSO<sub>2</sub>-<br/>Ph)</b>             | -819.968208517 | 0.144680 | -820.051679504 | 0.144936 | -819.452901969 | 0.145481 | -820.216950134 | 0.147142 |
| <b>27 (MeSO<sub>2</sub>-<br/>Bn)</b>             | -859.255764449 | 0.172068 | -859.340879411 | 0.173296 | -858.711423219 | 0.174558 | -859.538493723 | 0.176590 |
| <b>Me•</b>                                       | -39.8012533588 | 0.033484 | -39.7953010291 | 0.033692 | -39.7683230727 | 0.033259 | -39.8448220439 | 0.033626 |
| <b>•SH</b>                                       | -398.722318211 | 0.009392 | -398.764706015 | 0.009638 | -398.542908260 | 0.009274 | -398.742957423 | 0.009363 |
| <b>Et•</b>                                       | -79.0924582572 | 0.062557 | -79.0897313326 | 0.062884 | -79.0308662498 | 0.063170 | -79.1703590643 | 0.064030 |
| <b>nPr•</b>                                      | -118.377135600 | 0.091982 | -118.376654327 | 0.091474 | -118.286747129 | 0.092501 | -118.489836057 | 0.093761 |
| <b>iPr•</b>                                      | -118.384413103 | 0.091144 | -118.384695180 | 0.091612 | -118.294241832 | 0.092539 | -118.496514942 | 0.093915 |
| <b>nBu•</b>                                      | -157.662222214 | 0.120486 | -157.664069379 | 0.120098 | -157.543170907 | 0.121755 | -157.809695630 | 0.123414 |
| <b>tBu•</b>                                      | -157.676331172 | 0.119599 | -157.679542519 | 0.120286 | -157.557624513 | 0.121669 | -157.822605225 | 0.123526 |
| <b>Cypen•</b>                                    | -195.756748357 | 0.130067 | -195.768856800 | 0.129755 | -195.611821897 | 0.129471 | -195.928865269 | 0.131133 |
| <b>Ph•</b>                                       | -231.447067045 | 0.091196 | -231.463560988 | 0.091648 | -231.254161228 | 0.090704 | -231.606189106 | 0.091755 |
| <b>Bn•</b>                                       | -270.772951468 | 0.119568 | -270.790770547 | 0.120140 | -270.549576511 | 0.118898 | -270.964146058 | 0.120121 |
| <b>MeCO•</b>                                     | -153.127480718 | 0.046598 | -153.131235465 | 0.047001 | -152.995275891 | 0.047160 | -153.202820212 | 0.047769 |
| <b>MeS•</b>                                      | -438.014096394 | 0.039006 | -438.059723211 | 0.038401 | -437.806184187 | 0.037835 | -438.070820813 | 0.039944 |
| <b>nPrS•</b>                                     | -516.585938909 | 0.097412 | -516.636928683 | 0.096987 | -516.321213145 | 0.098058 | -516.712470373 | 0.099346 |
| <b>EtS•</b>                                      | -477.300804065 | 0.068022 | -477.349010828 | 0.068322 | -477.064464635 | 0.068723 | -477.392434575 | 0.069784 |

|                          |                |            |                |          |                |          |                |          |
|--------------------------|----------------|------------|----------------|----------|----------------|----------|----------------|----------|
| <b>MeSS•</b>             | -836.227518998 | 0.043172   | -836.325466510 | 0.043511 | -835.845629088 | 0.043856 | -836.299325395 | 0.044479 |
| <b>MeSO<sub>2</sub>•</b> | -588.413259420 | 0.049290   | -588.471252661 | 0.050024 | -588.081603652 | 0.049789 | -588.502513584 | 0.050367 |
| <b>TPSSLYP1W</b>         |                |            |                |          |                |          |                |          |
|                          | <b>E</b>       | <b>TCE</b> |                |          |                |          |                |          |
| <b>1 (Me-SH)</b>         | -438.738732965 | 0.050489   |                |          |                |          |                |          |
| <b>2 (Et-SH)</b>         | -478.056480555 | 0.080234   |                |          |                |          |                |          |
| <b>3 (nPr-SH)</b>        | -517.373470659 | 0.109781   |                |          |                |          |                |          |
| <b>4 (iPr-SH)</b>        | -517.375703065 | 0.109282   |                |          |                |          |                |          |
| <b>5 (tBu-SH)</b>        | -556.693163549 | 0.138161   |                |          |                |          |                |          |
| <b>6 (cypen-SH)</b>      | -594.800538058 | 0.145667   |                |          |                |          |                |          |
| <b>7 (Ph-SH)</b>         | -630.526442380 | 0.105297   |                |          |                |          |                |          |
| <b>8 (Bn-SH)</b>         | -669.843744796 | 0.135001   |                |          |                |          |                |          |
| <b>9 (MeCO-SH)</b>       | -552.115644006 | 0.060609   |                |          |                |          |                |          |
| <b>10 (MeS-Me)</b>       | -478.058843339 | 0.081461   |                |          |                |          |                |          |
| <b>11 (MeS-Et)</b>       | -517.376496049 | 0.111184   |                |          |                |          |                |          |
| <b>12 (MeS-nPr)</b>      | -556.693432497 | 0.140941   |                |          |                |          |                |          |
| <b>13 (nPrS-</b>         | -635.327964894 | 0.200340   |                |          |                |          |                |          |

|                                      |                |          |
|--------------------------------------|----------------|----------|
| <b><sup>n</sup>Pr)</b>               |                |          |
| <b>14(MeS-<sup>t</sup>Bu)</b>        | -596.011127823 | 0.169283 |
| <b>15 (MeS-Ph)</b>                   | -669.846662966 | 0.136541 |
| <b>16 (MeS-Bn)</b>                   | -709.165068139 | 0.166107 |
| <b>17 (EtS-<sup>t</sup>Bu)</b>       | -635.328533186 | 0.198190 |
| <b>18 (EtS-<br/>COMe)</b>            | -630.757070750 | 0.120690 |
| <b>19 (MeSS-<br/>Me)</b>             | -876.298146811 | 0.084619 |
| <b>20 (MeSS-<br/>Et)</b>             | -915.616362037 | 0.114437 |
| <b>21 (MeSS-<br/><sup>i</sup>Pr)</b> | -954.935402455 | 0.143608 |
| <b>22 (MeSO<sub>2</sub>-<br/>Me)</b> | -628.500598928 | 0.091602 |
| <b>23 (MeSO<sub>2</sub>-<br/>Et)</b> | -667.820085224 | 0.121468 |

|                                                  |                |          |
|--------------------------------------------------|----------------|----------|
| <b>24 (MeSO<sub>2</sub>-<br/>iPr)</b>            | -707.139295051 | 0.150784 |
| <b>25 (MeSO<sub>2</sub>-<br/><sup>n</sup>Bu)</b> | -746.454252451 | 0.180828 |
| <b>26 (MeSO<sub>2</sub>-<br/>Ph)</b>             | -820.288204454 | 0.146764 |
| <b>27 (MeSO<sub>2</sub>-<br/>Bn)</b>             | -859.607376189 | 0.176139 |
| <b>Me•</b>                                       | -39.8413318798 | 0.033675 |
| <b>•SH</b>                                       | -398.779876010 | 0.009309 |
| <b>Et•</b>                                       | -79.1636859342 | 0.064003 |
| <b>nPr•</b>                                      | -118.480466309 | 0.093707 |
| <b>iPr•</b>                                      | -118.486822150 | 0.093857 |
| <b>nBu•</b>                                      | -157.797818405 | 0.123510 |
| <b>tBu•</b>                                      | -157.810048677 | 0.123462 |
| <b>Cypen•</b>                                    | -195.915068376 | 0.130910 |
| <b>Ph•</b>                                       | -231.616623796 | 0.091568 |
| <b>Bn•</b>                                       | -270.973725373 | 0.119994 |
| <b>MeCO•</b>                                     | -153.222899785 | 0.047693 |
| <b>MeS•</b>                                      | -438.104440051 | 0.039495 |
| <b>nPrS•</b>                                     | -516.740314363 | 0.099279 |
| <b>EtS•</b>                                      | -477.423138992 | 0.069741 |

|                          |                |          |
|--------------------------|----------------|----------|
| <b>MeSS•</b>             | -836.369159348 | 0.044403 |
| <b>MeSO<sub>2</sub>•</b> | -588.567865578 | 0.050088 |

(b) The calculation results with different basis sets (M05-2X/BS)

|                     | 6-31G(d)       |          | 6-31+G(d)      |          | 6-31+G(d,p)    |          | 6-311+G(d,p)   |          |
|---------------------|----------------|----------|----------------|----------|----------------|----------|----------------|----------|
|                     | E              | TCE      | E              | TCE      | E              | TCE      | E              | TCE      |
| <b>1 (Me-SH)</b>    | -438.654199930 | 0.050597 | -438.656090471 | 0.050490 | -438.663539886 | 0.050275 | -438.701450744 | 0.050144 |
| <b>2 (Et-SH)</b>    | -477.961862279 | 0.081345 | -477.965535928 | 0.082008 | -477.975558464 | 0.081651 | -478.020819366 | 0.081461 |
| <b>3 (nPr-SH)</b>   | -517.269822355 | 0.112600 | -517.273381867 | 0.112332 | -517.286006971 | 0.111861 | -517.338430361 | 0.111719 |
| <b>4 (iPr-SH)</b>   | -517.272343688 | 0.112106 | -517.276042192 | 0.111815 | -517.288682521 | 0.111355 | -517.341268043 | 0.111132 |
| <b>5 ('Bu-SH)</b>   | -556.582776733 | 0.140502 | -556.587506825 | 0.140184 | -556.602647213 | 0.139545 | -556.662677960 | 0.139233 |
| <b>6 (cypen-SH)</b> | -594.683419248 | 0.150845 | -594.688264674 | 0.150488 | -594.703394469 | 0.149902 | -594.769497448 | 0.149657 |
| <b>7 (Ph-SH)</b>    | -630.379503400 | 0.108589 | -630.387072660 | 0.108354 | -630.398435035 | 0.108147 | -630.470018274 | 0.108102 |
| <b>8 (Bn-SH)</b>    | -669.686544384 | 0.139589 | -669.696387125 | 0.138993 | -669.710430051 | 0.138637 | -669.789479252 | 0.138435 |
| <b>9 (MeCO-SH)</b>  | -551.977951575 | 0.062286 | -551.985895001 | 0.062200 | -551.993317903 | 0.061953 | -552.060964492 | 0.062725 |
| <b>10 (MeS-Me)</b>  | -477.963248448 | 0.083657 | -477.965868080 | 0.083458 | -477.974144960 | 0.082993 | -478.018123970 | 0.082770 |
| <b>11 (MeS-Et)</b>  | -517.270867359 | 0.113947 | -517.274283905 | 0.113664 | -517.285146296 | 0.113072 | -517.336595580 | 0.112741 |



|                                                 |                |          |                |          |                |          |                |          |
|-------------------------------------------------|----------------|----------|----------------|----------|----------------|----------|----------------|----------|
| <b>12 (MeS-<sup>n</sup>Pr)</b>                  | -556.577619103 | 0.144709 | -556.582006259 | 0.144080 | -556.595459769 | 0.143368 | -556.654097582 | 0.143082 |
| <b>13 (<sup>n</sup>PrS-<br/><sup>n</sup>Pr)</b> | -635.191932136 | 0.204825 | -635.197434299 | 0.204259 | -635.215946628 | 0.204214 | -635.289023136 | 0.203777 |
| <b>14(MeS-<sup>t</sup>Bu)</b>                   | -595.889980479 | 0.172595 | -595.895133492 | 0.172221 | -595.911157154 | 0.171283 | -595.977482140 | 0.170520 |
| <b>15 (MeS-Ph)</b>                              | -669.688790444 | 0.139842 | -669.696922220 | 0.140500 | -669.709181271 | 0.140070 | -669.786967517 | 0.139671 |
| <b>16 (MeS-Bn)</b>                              | -708.998050748 | 0.171043 | -709.007059998 | 0.170714 | -709.021962367 | 0.170131 | -709.107347335 | 0.169737 |
| <b>17 (EtS-<sup>t</sup>Bu)</b>                  | -635.197209058 | 0.203102 | -635.203100954 | 0.203872 | -635.221646118 | 0.202843 | -635.295267563 | 0.202289 |
| <b>18 (EtS-<br/>COMe)</b>                       | -630.597960245 | 0.125067 | -630.606993072 | 0.124777 | -630.617969509 | 0.124193 | -630.698933494 | 0.123815 |
| <b>19 (MeSS-<br/>Me)</b>                        | -876.132704745 | 0.086809 | -876.136084056 | 0.086610 | -876.144415340 | 0.086159 | -876.217324974 | 0.085856 |
| <b>20 (MeSS-<br/>Et)</b>                        | -915.440902966 | 0.117531 | -915.445042390 | 0.117213 | -915.455908072 | 0.116644 | -915.536272492 | 0.116342 |
| <b>21 (MeSS-<br/><sup>i</sup>Pr)</b>            | -954.751656573 | 0.147387 | -954.756610360 | 0.146987 | -954.770116029 | 0.146280 | -954.858047950 | 0.145884 |
| <b>22 (MeSO<sub>2</sub>-<br/>Me)</b>            | -628.333396666 | 0.094590 | -628.344429939 | 0.094275 | -628.353122021 | 0.093851 | -628.436195300 | 0.093574 |

|                                                  |                |          |                |          |                |          |                |          |
|--------------------------------------------------|----------------|----------|----------------|----------|----------------|----------|----------------|----------|
| <b>23 (MeSO<sub>2</sub>-<br/>Et)</b>             | -667.642963605 | 0.124984 | -667.654319425 | 0.124599 | -667.665606858 | 0.124052 | -667.756493309 | 0.123918 |
| <b>24 (MeSO<sub>2</sub>-<br/>iPr)</b>            | -706.954180800 | 0.155163 | -706.965781019 | 0.154718 | -706.979667459 | 0.154007 | -707.078091529 | 0.153546 |
| <b>25 (MeSO<sub>2</sub>-<br/><sup>n</sup>Bu)</b> | -746.256976463 | 0.186218 | -746.269509200 | 0.185642 | -746.285903874 | 0.184815 | -746.391146514 | 0.184421 |
| <b>26 (MeSO<sub>2</sub>-<br/>Ph)</b>             | -820.058427622 | 0.151680 | -820.073502763 | 0.151306 | -820.086094036 | 0.150866 | -820.202743022 | 0.150614 |
| <b>27 (MeSO<sub>2</sub>-<br/>Bn)</b>             | -859.367103138 | 0.181984 | -859.383573991 | 0.181542 | -859.398777866 | 0.180984 | -859.523386604 | 0.180536 |
| <b>Me•</b>                                       | -39.8198821518 | 0.034437 | -39.8232485623 | 0.034469 | -39.8283044636 | 0.034334 | -39.8356093737 | 0.034212 |
| <b>•SH</b>                                       | -398.705508349 | 0.009554 | -398.706806921 | 0.009550 | -398.710343247 | 0.009575 | -398.741482559 | 0.009568 |
| <b>Et•</b>                                       | -79.1305257956 | 0.065521 | -79.1341699808 | 0.065379 | -79.1415917356 | 0.065068 | -79.1561310598 | 0.064915 |
| <b>nPr•</b>                                      | -118.436582794 | 0.095571 | -118.440959247 | 0.095336 | -118.450914642 | 0.094923 | -118.472884472 | 0.094096 |
| <b>iPr•</b>                                      | -118.442560844 | 0.096215 | -118.446527580 | 0.095874 | -118.456364181 | 0.095410 | -118.477996663 | 0.095142 |
| <b>nBu•</b>                                      | -157.743646095 | 0.125605 | -157.748686641 | 0.125281 | -157.761250074 | 0.124692 | -157.789924961 | 0.124229 |
| <b>tBu•</b>                                      | -157.755412114 | 0.126550 | -157.759702441 | 0.126181 | -157.771926672 | 0.125497 | -157.800574928 | 0.125146 |
| <b>Cypen•</b>                                    | -195.857287888 | 0.134620 | -195.862198208 | 0.134232 | -195.874573925 | 0.133651 | -195.909741949 | 0.133466 |
| <b>Ph•</b>                                       | -231.529714200 | 0.094536 | -231.537545559 | 0.094336 | -231.545589089 | 0.094108 | -231.586188863 | 0.094028 |
| <b>Bn•</b>                                       | -270.876008423 | 0.123507 | -270.884878705 | 0.123296 | -270.896150251 | 0.122971 | -270.944027224 | 0.122868 |
| <b>MeCO•</b>                                     | -153.148118855 | 0.049107 | -153.156194865 | 0.049030 | -153.160468586 | 0.048804 | -153.197890316 | 0.048704 |

|                          |                |            |                |            |                |          |                |          |
|--------------------------|----------------|------------|----------------|------------|----------------|----------|----------------|----------|
| <b>MeS•</b>              | -438.017677017 | 0.039141   | -438.019608528 | 0.038981   | -438.023907989 | 0.038706 | -438.060798613 | 0.038512 |
| <b>nPrS•</b>             | -516.633461838 | 0.101933   | -516.636925168 | 0.101594   | -516.646024122 | 0.100960 | -516.697920468 | 0.100948 |
| <b>EtS•</b>              | -477.325894282 | 0.071419   | -477.328734705 | 0.071294   | -477.335535897 | 0.070858 | -477.379759113 | 0.070681 |
| <b>MeSS•</b>             | -836.210661405 | 0.045660   | -836.213137389 | 0.045560   | -836.217356103 | 0.045334 | -836.281795252 | 0.045075 |
| <b>MeSO<sub>2</sub>•</b> | -588.395035945 | 0.052058   | -588.405957158 | 0.051864   | -588.410350786 | 0.051655 | -588.485389080 | 0.051510 |
| 6-311++                  |                |            |                |            |                |          |                |          |
| 6-311++G(d,p)            |                |            |                |            |                |          |                |          |
| G(2df,2p)                |                |            |                |            |                |          |                |          |
|                          | <b>E</b>       | <b>TCE</b> | <b>E</b>       | <b>TCE</b> |                |          |                |          |
| <b>1 (Me-SH)</b>         | -438.701797215 | 0.050162   | -438.711391623 | 0.050143   |                |          |                |          |
| <b>2 (Et-SH)</b>         | -478.021048748 | 0.081461   | -478.032995995 | 0.081420   |                |          |                |          |
| <b>3 (nPr-SH)</b>        | -517.338683752 | 0.111727   | -517.353292357 | 0.110715   |                |          |                |          |
| <b>4 (iPr-SH)</b>        | -517.341494212 | 0.111129   | -517.355856893 | 0.111198   |                |          |                |          |
| <b>5 (tBu-SH)</b>        | -556.662917099 | 0.139237   | -556.679691821 | 0.139361   |                |          |                |          |
| <b>6 (cypen-SH)</b>      | -594.769714757 | 0.149638   | -594.788748370 | 0.149697   |                |          |                |          |
| <b>7 (Ph-SH)</b>         | -630.470136280 | 0.108076   | -630.495834367 | 0.108477   |                |          |                |          |
| <b>8 (Bn-SH)</b>         | -669.789643505 | 0.138438   | -669.816942504 | 0.138699   |                |          |                |          |
| <b>9 (MeCO-SH)</b>       | -552.061090540 | 0.061648   | -552.076846668 | 0.062731   |                |          |                |          |
| <b>10 (MeS-Me)</b>       | -478.018435463 | 0.082789   | -478.031639159 | 0.082757   |                |          |                |          |

|                                                 |                |          |                |          |
|-------------------------------------------------|----------------|----------|----------------|----------|
| <b>11 (MeS-Et)</b>                              | -517.336835765 | 0.112719 | -517.352415808 | 0.112761 |
| <b>12 (MeS-<sup>n</sup>Pr)</b>                  | -556.654374464 | 0.143071 | -556.672619996 | 0.143075 |
| <b>13 (<sup>n</sup>PrS-<br/><sup>n</sup>Pr)</b> | -635.289415537 | 0.203771 | -635.313056713 | 0.202850 |
| <b>14(MeS-<sup>t</sup>Bu)</b>                   | -595.977782547 | 0.170531 | -595.998288262 | 0.170711 |
| <b>15 (MeS-Ph)</b>                              | -669.787169809 | 0.139688 | -669.816519109 | 0.139999 |
| <b>16 (MeS-Bn)</b>                              | -709.107605388 | 0.169732 | -709.138502880 | 0.170054 |
| <b>17 (EtS-<sup>t</sup>Bu)</b>                  | -635.295594732 | 0.202284 | -635.318652692 | 0.202378 |
| <b>18 (EtS-<br/>COMe)</b>                       | -630.699227220 | 0.123825 | -630.721627117 | 0.123858 |
| <b>19 (MeSS-<br/>Me)</b>                        | -876.217760912 | 0.085879 | -876.241767473 | 0.085821 |
| <b>20 (MeSS-<br/>Et)</b>                        | -915.536713971 | 0.116362 | -915.562988747 | 0.116345 |
| <b>21 (MeSS-<br/><sup>i</sup>Pr)</b>            | -954.858503311 | 0.145891 | -954.887050649 | 0.145962 |
| <b>22 (MeSO<sub>2</sub>-</b>                    | -628.436466792 | 0.093560 | -628.497995441 | 0.093691 |

|                              |                |          |                |          |
|------------------------------|----------------|----------|----------------|----------|
| <b>Me)</b>                   |                |          |                |          |
| <b>23 (MeSO<sub>2</sub>-</b> |                |          |                |          |
| <b>Et)</b>                   | -667.756807747 | 0.123918 | -667.820286253 | 0.124142 |
| <b>24 (MeSO<sub>2</sub>-</b> |                |          |                |          |
| <b>iPr)</b>                  | -707.078447253 | 0.153543 | -707.143687858 | 0.153863 |
| <b>25 (MeSO<sub>2</sub>-</b> |                |          |                |          |
| <b>nBu)</b>                  | -746.391587789 | 0.184431 | -746.460315130 | 0.184674 |
| <b>26 (MeSO<sub>2</sub>-</b> |                |          |                |          |
| <b>Ph)</b>                   | -820.202912399 | 0.150571 | -820.278835720 | 0.151152 |
| <b>27 (MeSO<sub>2</sub>-</b> |                |          |                |          |
| <b>Bn)</b>                   | -859.523624028 | 0.180532 | -859.602367053 | 0.181042 |
| <b>Me•</b>                   | -39.8356400187 | 0.034211 | -39.8387930338 | 0.034282 |
| <b>•SH</b>                   | -398.741585539 | 0.009568 | -398.745562133 | 0.009550 |
| <b>Et•</b>                   | -79.1561906941 | 0.064912 | -79.1623308881 | 0.065065 |
| <b>nPr•</b>                  | -118.472963301 | 0.095002 | -118.481953662 | 0.094315 |
| <b>iPr•</b>                  | -118.478092674 | 0.095146 | -118.487188546 | 0.095304 |
| <b>nBu•</b>                  | -157.790043016 | 0.124225 | -157.801768096 | 0.124453 |
| <b>tBu•</b>                  | -157.800712928 | 0.125089 | -157.812676499 | 0.125339 |
| <b>Cypen•</b>                | -195.909840650 | 0.133459 | -195.923600246 | 0.133669 |
| <b>Ph•</b>                   | -231.586241975 | 0.093994 | -231.605119916 | 0.094284 |
| <b>Bn•</b>                   | -270.944111973 | 0.122860 | -270.966234181 | 0.123276 |

|                          |                |          |                |          |
|--------------------------|----------------|----------|----------------|----------|
| <b>MeCO•</b>             | -153.197967932 | 0.048707 | -153.207548753 | 0.048783 |
| <b>MeS•</b>              | -438.061014935 | 0.038507 | -438.068789544 | 0.038483 |
| <b>nPrS•</b>             | -516.698146765 | 0.100967 | -516.710470719 | 0.100364 |
| <b>EtS•</b>              | -477.379977818 | 0.070712 | -477.390107537 | 0.070481 |
| <b>MeSS•</b>             | -836.282142176 | 0.045094 | -836.304039292 | 0.044176 |
| <b>MeSO<sub>2</sub>•</b> | -588.485614252 | 0.051514 | -588.538754846 | 0.051763 |

(c) The calculation results with different basis sets (M06-2X/*BS*)

|                     | <b>6-31G(d)</b> |            | 6-31+G(d)      |            | 6-31+G(d,p)    |            | 6-311+<br>G(d,p) |            |
|---------------------|-----------------|------------|----------------|------------|----------------|------------|------------------|------------|
|                     | <b>E</b>        | <b>TCE</b> | <b>E</b>       | <b>TCE</b> | <b>E</b>       | <b>TCE</b> | <b>E</b>         | <b>TCE</b> |
| <b>1 (Me-SH)</b>    | -438.627397902  | 0.050328   | -438.629250561 | 0.050221   | -438.635343443 | 0.049991   | -438.675003639   | 0.049821   |
| <b>2 (Et-SH)</b>    | -477.920853305  | 0.080774   | -477.923652776 | 0.080586   | -477.932695006 | 0.081193   | -477.979466810   | 0.079984   |
| <b>3 (nPr-SH)</b>   | -517.213652492  | 0.111736   | -517.218471483 | 0.111717   | -517.228608771 | 0.111264   | -517.284254785   | 0.111090   |
| <b>4 (iPr-SH)</b>   | -517.217199566  | 0.111368   | -517.220975490 | 0.111097   | -517.231137914 | 0.110600   | -517.286845308   | 0.110358   |
| <b>5 (tBu-SH)</b>   | -556.513294568  | 0.139656   | -556.518118454 | 0.139327   | -556.530222506 | 0.138673   | -556.593959130   | 0.138275   |
| <b>6 (cypen-SH)</b> | -594.600859351  | 0.149868   | -594.605880779 | 0.149525   | -594.617939748 | 0.148935   | -594.688731133   | 0.148628   |
| <b>7 (Ph-SH)</b>    | -630.288473046  | 0.107835   | -630.296328199 | 0.107581   | -630.305598353 | 0.107373   | -630.382599781   | 0.107145   |
| <b>8 (Bn-SH)</b>    | -669.581377336  | 0.138581   | -669.591574331 | 0.138292   | -669.602887209 | 0.137931   | -669.688157314   | 0.137625   |
| <b>9 (MeCO-</b>     | -551.922730850  | 0.061969   | -551.930252037 | 0.061866   | -551.936308696 | 0.061586   | -552.006926865   | 0.062331   |

| <b>SH)</b>                                      |                |          |                |          |                |          |                |          |
|-------------------------------------------------|----------------|----------|----------------|----------|----------------|----------|----------------|----------|
| <b>10 (MeS-Me)</b>                              | -477.921863742 | 0.082971 | -477.924510915 | 0.082769 | -477.930986247 | 0.082330 | -477.977792189 | 0.082194 |
| <b>11 (MeS-Et)</b>                              | -517.215474331 | 0.113012 | -517.218968460 | 0.112762 | -517.227474630 | 0.112165 | -517.282481932 | 0.111853 |
| <b>12 (MeS-<sup>n</sup>Pr)</b>                  | -556.508048724 | 0.143599 | -556.512665912 | 0.143042 | -556.523200787 | 0.142330 | -556.586165081 | 0.142026 |
| <b>13 (<sup>n</sup>PrS-<br/><sup>n</sup>Pr)</b> | -635.094106421 | 0.204208 | -635.099831835 | 0.203649 | -635.114272638 | 0.202701 | -635.193138593 | 0.202383 |
| <b>14(MeS-<sup>t</sup>Bu)</b>                   | -595.806239053 | 0.171364 | -595.811527659 | 0.170974 | -595.824086506 | 0.170094 | -595.895219625 | 0.169633 |
| <b>15 (MeS-Ph)</b>                              | -669.583367572 | 0.139633 | -669.591836533 | 0.139374 | -669.601551166 | 0.138952 | -669.685871257 | 0.138568 |
| <b>16 (MeS-Bn)</b>                              | -708.878423399 | 0.169578 | -708.887814414 | 0.169266 | -708.899541154 | 0.168695 | -708.992213091 | 0.168228 |
| <b>17 (EtS-<sup>t</sup>Bu)</b>                  | -635.099318468 | 0.203043 | -635.105388748 | 0.202543 | -635.119897781 | 0.201544 | -635.199025087 | 0.200992 |
| <b>18 (EtS-<br/>COMe)</b>                       | -630.513592563 | 0.125092 | -630.522330528 | 0.123813 | -630.530878663 | 0.123217 | -630.616637470 | 0.122799 |
| <b>19 (MeSS-<br/>Me)</b>                        | -876.080401691 | 0.086157 | -876.083690921 | 0.085976 | -876.090190454 | 0.085537 | -876.166680396 | 0.085191 |
| <b>20 (MeSS-<br/>Et)</b>                        | -915.374377494 | 0.116745 | -915.378472860 | 0.116440 | -915.386934871 | 0.115879 | -915.471610929 | 0.115517 |
| <b>21 (MeSS-</b>                                | -954.671079503 | 0.146453 | -954.676038662 | 0.146064 | -954.686585996 | 0.145375 | -954.779452727 | 0.144989 |

|                                                  |                |          |                |          |                |          |                |          |
|--------------------------------------------------|----------------|----------|----------------|----------|----------------|----------|----------------|----------|
| <b>iPr)</b>                                      |                |          |                |          |                |          |                |          |
| <b>22 (MeSO<sub>2</sub>-<br/>Me)</b>             | -628.254533646 | 0.093919 | -628.264993337 | 0.093607 | -628.271809319 | 0.093206 | -628.358349510 | 0.093003 |
| <b>23 (MeSO<sub>2</sub>-<br/>Et)</b>             | -667.550085301 | 0.124213 | -667.560933680 | 0.123831 | -667.569783480 | 0.123288 | -667.664723325 | 0.122958 |
| <b>24 (MeSO<sub>2</sub>-<br/>iPr)</b>            | -706.847146147 | 0.154129 | -706.858333379 | 0.153690 | -706.869196847 | 0.152981 | -706.972657884 | 0.152557 |
| <b>25 (MeSO<sub>2</sub>-<br/><sup>n</sup>Bu)</b> | -746.135891502 | 0.184850 | -746.148056723 | 0.184322 | -746.160861576 | 0.183534 | -746.271951533 | 0.183248 |
| <b>26 (MeSO<sub>2</sub>-<br/>Ph)</b>             | -819.915457996 | 0.150509 | -819.930388079 | 0.150140 | -819.940295258 | 0.149738 | -820.064195323 | 0.149354 |
| <b>27 (MeSO<sub>2</sub>-<br/>Bn)</b>             | -859.210218349 | 0.180694 | -859.226528659 | 0.180208 | -859.238475053 | 0.179667 | -859.371124681 | 0.179203 |
| <b>Me•</b>                                       | -39.8042299171 | 0.034094 | -39.8079783854 | 0.034127 | -39.8119078464 | 0.034000 | -39.8208781956 | 0.033827 |
| <b>•SH</b>                                       | -398.693941321 | 0.009614 | -398.695179180 | 0.009608 | -398.698262004 | 0.009622 | -398.729951090 | 0.009621 |
| <b>Et•</b>                                       | -79.1005060515 | 0.065071 | -79.1045685392 | 0.064895 | -79.1103989633 | 0.064606 | -79.1274031998 | 0.064365 |
| <b>nPr•</b>                                      | -118.392651695 | 0.094919 | -118.397545421 | 0.094678 | -118.405331264 | 0.094272 | -118.430518257 | 0.094354 |
| <b>iPr•</b>                                      | -118.398565891 | 0.095588 | -118.403000259 | 0.095201 | -118.410749797 | 0.094748 | -118.435598485 | 0.094497 |
| <b>nBu•</b>                                      | -157.685630091 | 0.125661 | -157.691242231 | 0.125309 | -157.701088510 | 0.124731 | -157.733871719 | 0.124150 |
| <b>tBu•</b>                                      | -157.697655052 | 0.125839 | -157.702517176 | 0.125491 | -157.712141059 | 0.124745 | -157.744724310 | 0.124411 |



|                          |                |          |                |          |                |          |                |          |
|--------------------------|----------------|----------|----------------|----------|----------------|----------|----------------|----------|
| <b>Cypen•</b>            | -195.785682657 | 0.133788 | -195.791193344 | 0.133419 | -195.800902833 | 0.132842 | -195.840849617 | 0.132561 |
| <b>Ph•</b>               | -231.451696612 | 0.093871 | -231.460204636 | 0.093665 | -231.466569566 | 0.093469 | -231.512726063 | 0.093284 |
| <b>Bn•</b>               | -270.779420791 | 0.122341 | -270.789037066 | 0.122132 | -270.798003616 | 0.121868 | -270.852192109 | 0.121620 |
| <b>MeCO•</b>             | -153.103720484 | 0.048754 | -153.112044270 | 0.048678 | -153.115384297 | 0.048456 | -153.155483388 | 0.048323 |
| <b>MeS•</b>              | -437.990899469 | 0.042055 | -437.992834470 | 0.041934 | -437.996212001 | 0.041589 | -438.034767750 | 0.041415 |
| <b>nPrS•</b>             | -516.578646052 | 0.102843 | -516.581787880 | 0.102494 | -516.589143510 | 0.102140 | -516.643705840 | 0.101521 |
| <b>EtS•</b>              | -477.284991710 | 0.072691 | -477.287915979 | 0.072674 | -477.293244823 | 0.072393 | -477.339888617 | 0.072104 |
| <b>MeSS•</b>             | -836.171603676 | 0.045179 | -836.173981129 | 0.045084 | -836.177263350 | 0.044874 | -836.244312576 | 0.043671 |
| <b>MeSO<sub>2</sub>•</b> | -588.331588099 | 0.051670 | -588.342003402 | 0.051475 | -588.345420632 | 0.051270 | -588.423182120 | 0.051120 |

---

6-311++

6-311++G(d,p)

G(2df,2p)

|                     | <b>E</b>       | <b>TCE</b> | <b>E</b>       | <b>TCE</b> |
|---------------------|----------------|------------|----------------|------------|
| <b>1 (Me-SH)</b>    | -438.675318635 | 0.049835   | -438.683938866 | 0.049687   |
| <b>2 (Et-SH)</b>    | -477.980612287 | 0.080899   | -477.991026616 | 0.080683   |
| <b>3 (nPr-SH)</b>   | -517.284481573 | 0.111092   | -517.295902135 | 0.109252   |
| <b>4 (iPr-SH)</b>   | -517.287050325 | 0.110351   | -517.299313578 | 0.110240   |
| <b>5 (tBu-SH)</b>   | -556.594181442 | 0.138278   | -556.608300887 | 0.138192   |
| <b>6 (cypen-SH)</b> | -594.688918520 | 0.148603   | -594.705097370 | 0.147488   |
| <b>7 (Ph-SH)</b>    | -630.382704278 | 0.107075   | -630.405113049 | 0.107313   |
| <b>8 (Bn-SH)</b>    | -669.688304649 | 0.137658   | -669.711688930 | 0.137636   |

|                                            |                |          |                |          |
|--------------------------------------------|----------------|----------|----------------|----------|
| <b>9 (MeCO-SH)</b>                         | -552.007062744 | 0.062321 | -552.021295015 | 0.062227 |
| <b>10 (MeS-Me)</b>                         | -477.978063543 | 0.082203 | -477.989564963 | 0.082080 |
| <b>11 (MeS-Et)</b>                         | -517.282688046 | 0.111823 | -517.295967473 | 0.111640 |
| <b>12 (MeS-<sup>n</sup>Pr)</b>             | -556.586405535 | 0.142016 | -556.601791371 | 0.141803 |
| <b>13 (<sup>n</sup>PrS-<sup>n</sup>Pr)</b> | -635.193488640 | 0.202373 | -635.213162626 | 0.202168 |
| <b>14(MeS-<sup>t</sup>Bu)</b>              | -595.895492440 | 0.169631 | -595.912601117 | 0.169533 |
| <b>15 (MeS-Ph)</b>                         | -669.686046198 | 0.138581 | -669.711387138 | 0.138652 |
| <b>16 (MeS-Bn)</b>                         | -708.992440836 | 0.168216 | -709.018652976 | 0.168152 |
| <b>17 (EtS-<sup>t</sup>Bu)</b>             | -635.199323695 | 0.200987 | -635.218436796 | 0.200926 |
| <b>18 (EtS-COMe)</b>                       | -630.616904575 | 0.122805 | -630.636413489 | 0.122646 |
| <b>19 (MeSS-Me)</b>                        | -876.167073245 | 0.085211 | -876.189034389 | 0.085040 |
| <b>20 (MeSS-Et)</b>                        | -915.472005810 | 0.115527 | -915.495665683 | 0.115399 |

|                                                  |                |          |                |          |
|--------------------------------------------------|----------------|----------|----------------|----------|
| <b>21 (MeSS-<br/>iPr)</b>                        | -954.779867170 | 0.144992 | -954.805217315 | 0.144871 |
| <b>22 (MeSO<sub>2</sub>-<br/>Me)</b>             | -628.358627336 | 0.092986 | -628.415648855 | 0.093074 |
| <b>23 (MeSO<sub>2</sub>-<br/>Et)</b>             | -667.665052939 | 0.122950 | -667.723432461 | 0.123193 |
| <b>24 (MeSO<sub>2</sub>-<br/>iPr)</b>            | -706.973011419 | 0.152556 | -707.032469559 | 0.152659 |
| <b>25 (MeSO<sub>2</sub>-<br/><sup>n</sup>Bu)</b> | -746.272380341 | 0.183247 | -746.334805398 | 0.183269 |
| <b>26 (MeSO<sub>2</sub>-<br/>Ph)</b>             | -820.064357989 | 0.149310 | -820.133351404 | 0.149659 |
| <b>27 (MeSO<sub>2</sub>-<br/>Bn)</b>             | -859.371358554 | 0.179204 | -859.442537755 | 0.179375 |
| <b>Me•</b>                                       | -39.8209116390 | 0.033826 | -39.8232703096 | 0.033860 |
| <b>•SH</b>                                       | -398.730048102 | 0.009621 | -398.733932681 | 0.009591 |
| <b>Et•</b>                                       | -79.1274692679 | 0.064361 | -79.1323358801 | 0.064369 |
| <b>nPr•</b>                                      | -118.430593487 | 0.094345 | -118.437706215 | 0.094358 |
| <b>iPr•</b>                                      | -118.435699291 | 0.094497 | -118.443000387 | 0.094484 |

|                          |                |          |                |          |
|--------------------------|----------------|----------|----------------|----------|
| <b>nBu•</b>              | -157.733971052 | 0.124142 | -157.743226238 | 0.124070 |
| <b>tBu•</b>              | -157.744843314 | 0.124534 | -157.754448475 | 0.124417 |
| <b>Cypen•</b>            | -195.840933361 | 0.132557 | -195.852136480 | 0.132559 |
| <b>Ph•</b>               | -231.512778438 | 0.093264 | -231.528535192 | 0.093375 |
| <b>Bn•</b>               | -270.852270261 | 0.121619 | -270.870754150 | 0.121821 |
| <b>MeCO•</b>             | -153.155571915 | 0.048324 | -153.164187390 | 0.048311 |
| <b>MeS•</b>              | -438.034970059 | 0.041433 | -438.041855943 | 0.041322 |
| <b>nPrS•</b>             | -516.643940502 | 0.101568 | -516.654729030 | 0.101145 |
| <b>EtS•</b>              | -477.340089689 | 0.072137 | -477.348778304 | 0.071906 |
| <b>MeSS•</b>             | -836.244628338 | 0.043684 | -836.265049169 | 0.043618 |
| <b>MeSO<sub>2</sub>•</b> | -588.423414517 | 0.051123 | -588.473703290 | 0.051329 |

---

**Table S2.** Comparison between BDEs calculated by M05-2X/*BS* and the experimental results of selected C-S compounds.

| Reactant                        | BDE <sup>exp</sup> | BDE <sup>calc</sup> |           |             |              |               |                  |
|---------------------------------|--------------------|---------------------|-----------|-------------|--------------|---------------|------------------|
|                                 |                    | 6-31G(d)            | 6-31+G(d) | 6-31+G(d,p) | 6-311+G(d,p) | 6-311++G(d,p) | 6-311++G(2df,2p) |
| <b>1 (Me-SH)</b>                | <b>74.7±1</b>      | 76.7                | 75.0      | 74.4        | 74.0         | 74.2          | 75.8             |
| <b>2 (Et-SH)</b>                | <b>73.6±0.5</b>    | 75.0                | 73.7      | 73.2        | 72.9         | 73.0          | 74.2             |
| <b>3 (nPr-SH)</b>               | <b>74.2±0.7</b>    | 75.5                | 74.2      | 73.7        | 72.8         | 73.4          | 74.6             |
| <b>4 (iPr-SH)</b>               | <b>73.4±0.9</b>    | 74.0                | 73.0      | 72.5        | 72.4         | 72.4          | 73.3             |
| <b>5 (tBu-SH)</b>               | <b>72.0±0.9</b>    | 73.7                | 73.1      | 72.7        | 72.9         | 72.8          | 73.4             |
| <b>6 (cypen-SH)</b>             | <b>71.0±1.2</b>    | 71.5                | 70.6      | 70.2        | 70.1         | 70.1          | 71.0             |
| <b>7 (Ph-SH)</b>                | <b>86.2±1.5</b>    | 87.7                | 86.8      | 86.6        | 86.5         | 86.5          | 88.2             |
| <b>8 (Bn-SH)</b>                | <b>61.7±1.5</b>    | 61.8                | 61.8      | 61.4        | 61.5         | 61.5          | 62.3             |
| <b>9 (MeCO-SH)</b>              | <b>73.6±1.5</b>    | 75.7                | 74.8      | 74.6        | 73.5         | 74.2          | 74.9             |
| <b>10 (MeS-Me)</b>              | <b>73.6±0.8</b>    | 72.5                | 70.9      | 70.3        | 70.1         | 70.1          | 71.6             |
| <b>11 (MeS-Et)</b>              | <b>72.4±1</b>      | 71.1                | 69.8      | 69.2        | 69.3         | 69.2          | 70.3             |
| <b>12 (MeS-nPr)</b>             | <b>73.3±1.5</b>    | 71.1                | 70.1      | 69.6        | 69.0         | 69.6          | 70.0             |
| <b>13 (nPrS-nPr)</b>            | <b>72.8±1.5</b>    | 71.9                | 70.4      | 69.5        | 68.7         | 69.3          | 70.6             |
| <b>14(MeS-tBu)</b>              | <b>70.4±1.5</b>    | 69.0                | 68.3      | 67.9        | 68.6         | 68.5          | 67.0             |
| <b>15 (MeS-Ph)</b>              | <b>85.4±1.5</b>    | 84.9                | 83.2      | 83.1        | 83.4         | 83.3          | 85.0             |
| <b>16 (MeS-Bn)</b>              | <b>60.5±1</b>      | 60.2                | 59.1      | 58.6        | 59.1         | 59.1          | 59.7             |
| <b>17 (EtS-tBu)</b>             | <b>71.1±1.5</b>    | 69.5                | 67.9      | 67.6        | 68.1         | 68.0          | 68.6             |
| <b>18 (EtS-COMe)</b>            | <b>76.2±2</b>      | 74.9                | 73.8      | 73.7        | 73.3         | 73.3          | 74.9             |
| <b>19 (MeSS-Me)</b>             | <b>57.4±1.5</b>    | 59.9                | 58.4      | 57.9        | 58.6         | 58.6          | 57.5             |
| <b>20 (MeSS-Et)</b>             | <b>56.2±2</b>      | 58.6                | 57.4      | 56.9        | 57.7         | 57.8          | 56.2             |
| <b>21 (MeSS-iPr)</b>            | <b>54.5±2</b>      | 58.3                | 57.4      | 57.0        | 58.1         | 58.1          | 56.1             |
| <b>22 (MeSO<sub>2</sub>-Me)</b> | <b>68</b>          | 69.3                | 67.3      | 66.9        | 67.4         | 67.4          | 70.8             |
| <b>23 (MeSO<sub>2</sub>-Et)</b> | <b>68.9±2</b>      | 69.0                | 67.0      | 66.7        | 67.5         | 67.5          | 70.2             |

|                                             |               |        |        |        |        |        |        |
|---------------------------------------------|---------------|--------|--------|--------|--------|--------|--------|
| <b>24 (MeSO<sub>2</sub>-<i>i</i>Pr)</b>     | <b>67.5±2</b> | 68.8   | 66.7   | 66.5   | 67.6   | 67.7   | 69.6   |
| <b>25 (MeSO<sub>2</sub>-<sup>n</sup>Bu)</b> | <b>71.3±2</b> | 68.9   | 66.8   | 66.4   | 67.2   | 67.3   | 69.9   |
| <b>26 (MeSO<sub>2</sub>-Ph)</b>             | <b>82.3±2</b> | 80.7   | 78.4   | 78.5   | 79.1   | 79.1   | 81.5   |
| <b>27 (MeSO<sub>2</sub>-Bn)</b>             | <b>57.5±2</b> | 56.2   | 54.2   | 53.9   | 55.1   | 55.1   | 57.3   |
| R                                           | /             | 0.9794 | 0.9735 | 0.9740 | 0.9720 | 0.9728 | 0.9788 |
| SD(kcal/mol)                                | /             | 1.7    | 1.9    | 1.8    | 1.9    | 1.9    | 1.7    |
| RMSD(kcal/mol)                              | /             | 1.6    | 2.1    | 2.3    | 2.3    | 2.2    | 1.6    |

**Table S3.** Comparison between BDEs calculated by M06-2X/*BS* and the experimental results of selected C-S compounds.

| Reactant                         | BDE <sup>exp</sup> | BDE <sup>calc</sup> |           |             |              |               |                  |
|----------------------------------|--------------------|---------------------|-----------|-------------|--------------|---------------|------------------|
|                                  |                    | 6-31G(d)            | 6-31+G(d) | 6-31+G(d,p) | 6-311+G(d,p) | 6-311++G(d,p) | 6-311++G(2df,2p) |
| <b>1 (Me-SH)</b>                 | <b>74.7±1</b>      | 76.9                | 75.1      | 74.6        | 73.9         | 74.0          | 75.6             |
| <b>2 (Et-SH)</b>                 | <b>73.6±0.5</b>    | 75.5                | 73.9      | 73.5        | 72.9         | 72.9          | 74.1             |
| <b>3 (nPr-SH)</b>                | <b>74.2±0.7</b>    | 75.2                | 74.2      | 73.8        | 73.2         | 73.2          | 74.6             |
| <b>4 (iPr-SH)</b>                | <b>73.4±0.9</b>    | 74.4                | 73.1      | 72.7        | 72.2         | 72.2          | 72.9             |
| <b>5 (tBu-SH)</b>                | <b>72.0±0.9</b>    | 73.7                | 72.9      | 72.5        | 72.2         | 72.3          | 72.6             |
| <b>6 (cypen-SH)</b>              | <b>71.0±1.2</b>    | 72.0                | 70.9      | 70.5        | 70.0         | 70.0          | 71.3             |
| <b>7 (Ph-SH)</b>                 | <b>86.2±1.5</b>    | 86.9                | 85.7      | 85.6        | 85.1         | 85.1          | 86.8             |
| <b>8 (Bn-SH)</b>                 | <b>61.7±1.5</b>    | 63.6                | 63.3      | 62.9        | 62.5         | 62.5          | 63.2             |
| <b>9 (MeCO-SH)</b>               | <b>73.6±1.5</b>    | 76.2                | 75.0      | 74.8        | 73.5         | 73.5          | 74.6             |
| <b>10 (MeS-Me)</b>               | <b>73.6±0.8</b>    | 75.2                | 73.4      | 72.9        | 72.3         | 72.3          | 73.8             |
| <b>11 (MeS-Et)</b>               | <b>72.4±1</b>      | 74.2                | 72.6      | 72.1        | 71.7         | 71.7          | 72.7             |
| <b>12 (MeS-nPr)</b>              | <b>73.3±1.5</b>    | 74.0                | 72.7      | 72.3        | 71.9         | 71.9          | 72.9             |
| <b>13 (nPrS-nPr)</b>             | <b>72.8±1.5</b>    | 73.0                | 71.5      | 71.2        | 70.5         | 70.6          | 71.6             |
| <b>14 (MeS-tBu)</b>              | <b>70.4±1.5</b>    | 71.7                | 70.7      | 70.3        | 70.2         | 70.3          | 70.6             |
| <b>15 (MeS-Ph)</b>               | <b>85.4±1.5</b>    | 86.0                | 84.7      | 84.6        | 84.4         | 84.3          | 86.0             |
| <b>16 (MeS-Bn)</b>               | <b>60.5±1</b>      | 64.6                | 63.2      | 62.8        | 62.8         | 62.8          | 63.4             |
| <b>17 (EtS-tBu)</b>              | <b>71.1±1.5</b>    | 70.4                | 69.4      | 69.1        | 69.0         | 69.1          | 69.4             |
| <b>18 (EtS-COMe)</b>             | <b>76.2±2</b>      | 76.1                | 75.2      | 75.2        | 74.6         | 74.6          | 75.9             |
| <b>19 (MeSS-Me)</b>              | <b>57.4±1.5</b>    | 61.3                | 59.6      | 59.2        | 58.9         | 58.9          | 58.5             |
| <b>20 (MeSS-Et)</b>              | <b>56.2±2</b>      | 60.1                | 58.6      | 58.3        | 58.0         | 58.0          | 57.0             |
| <b>21 (MeSS-iPr)</b>             | <b>54.5±2</b>      | 59.8                | 58.5      | 58.2        | 58.2         | 58.2          | 56.7             |
| <b>22 (MeSO<sub>2</sub>-Me)</b>  | <b>68</b>          | 69.4                | 67.1      | 66.9        | 66.7         | 66.7          | 69.5             |
| <b>23 (MeSO<sub>2</sub>-Et)</b>  | <b>68.9±2</b>      | 69.4                | 67.1      | 66.9        | 66.9         | 67.0          | 69.0             |
| <b>24 (MeSO<sub>2</sub>-iPr)</b> | <b>67.5±2</b>      | 69.1                | 66.7      | 66.6        | 67.1         | 67.1          | 68.3             |
| <b>25 (MeSO<sub>2</sub>-nBu)</b> | <b>71.3±2</b>      | 69.8                | 67.3      | 67.0        | 67.1         | 67.2          | 69.0             |
| <b>26 (MeSO<sub>2</sub>-Ph)</b>  | <b>82.3±2</b>      | 79.8                | 77.3      | 77.4        | 77.4         | 77.3          | 79.2             |

|                                 |               |        |        |        |        |        |        |
|---------------------------------|---------------|--------|--------|--------|--------|--------|--------|
| <b>27 (MeSO<sub>2</sub>-Bn)</b> | <b>57.5±2</b> | 58.1   | 55.8   | 55.5   | 56.0   | 56.0   | 57.6   |
| R                               | /             | 0.9786 | 0.9722 | 0.9742 | 0.9758 | 0.9759 | 0.9878 |
| SD(kcal/mol)                    | /             | 1.7    | 1.9    | 1.8    | 1.8    | 1.8    | 1.3    |
| RMSD(kcal/mol)                  | /             | 2.1    | 1.9    | 1.9    | 1.9    | 1.9    | 1.3    |

**Table S4.** Comparison between BDEs calculated by DFT/*BS* (DFT=M05-2X/M06-2X) and the experimental results for the MeSO<sub>2</sub>R compounds.

| Reactant                                    | BDE <sup>exp</sup> | BDE <sup>calc</sup> (M05-2X) |           |             |                |             |           |
|---------------------------------------------|--------------------|------------------------------|-----------|-------------|----------------|-------------|-----------|
|                                             |                    |                              |           |             | 6-             | 6-          | 6-311++   |
|                                             |                    | 6-31G(d)                     | 6-31+G(d) | 6-31+G(d,p) | 311+<br>G(d,p) | 311++G(d,p) | G(2df,2p) |
| <b>22 (MeSO<sub>2</sub>-Me)</b>             | <b>68</b>          | 69.3                         | 67.3      | 66.9        | 67.4           | 67.4        | 70.8      |
| <b>23 (MeSO<sub>2</sub>-Et)</b>             | <b>68.9±2</b>      | 69.0                         | 67.0      | 66.7        | 67.5           | 67.5        | 70.2      |
| <b>24 (MeSO<sub>2</sub>-<sup>i</sup>Pr)</b> | <b>67.5±2</b>      | 68.8                         | 66.7      | 66.5        | 67.6           | 67.7        | 69.6      |
| <b>25 (MeSO<sub>2</sub>-<sup>n</sup>Bu)</b> | <b>71.3±2</b>      | 68.9                         | 66.8      | 66.4        | 67.2           | 67.3        | 69.9      |
| <b>26 (MeSO<sub>2</sub>-Ph)</b>             | <b>82.3±2</b>      | 80.7                         | 78.4      | 78.5        | 79.1           | 79.1        | 81.5      |
| <b>27 (MeSO<sub>2</sub>-Bn)</b>             | <b>57.5±2</b>      | 56.2                         | 54.2      | 53.9        | 55.1           | 55.1        | 57.3      |
| R                                           | /                  | 0.9805                       | 0.9793    | 0.9800      | 0.9801         | 0.9802      | 0.9775    |
| SD(kcal/mol)                                | /                  | 1.6                          | 1.6       | 1.6         | 1.6            | 1.6         | 1.7       |
| RMSD(kcal/mol)                              | /                  | 1.5                          | 2.9       | 3.1         | 2.4            | 2.4         | 1.7       |

  

| Reactant                                    | BDE <sup>exp</sup> | BDE <sup>calc</sup> (M06-2X) |           |             |                |             |           |
|---------------------------------------------|--------------------|------------------------------|-----------|-------------|----------------|-------------|-----------|
|                                             |                    |                              |           |             | 6-             | 6-          | 6-311++   |
|                                             |                    | 6-31G(d)                     | 6-31+G(d) | 6-31+G(d,p) | 311+<br>G(d,p) | 311++G(d,p) | G(2df,2p) |
| <b>22 (MeSO<sub>2</sub>-Me)</b>             | <b>68</b>          | 69.4                         | 67.1      | 66.9        | 66.7           | 66.7        | 69.5      |
| <b>23 (MeSO<sub>2</sub>-Et)</b>             | <b>68.9±2</b>      | 69.4                         | 67.1      | 66.9        | 66.9           | 67.0        | 69.0      |
| <b>24 (MeSO<sub>2</sub>-<sup>i</sup>Pr)</b> | <b>67.5±2</b>      | 69.1                         | 66.7      | 66.6        | 67.1           | 67.1        | 68.3      |
| <b>25 (MeSO<sub>2</sub>-<sup>n</sup>Bu)</b> | <b>71.3±2</b>      | 69.8                         | 67.3      | 67.0        | 67.1           | 67.2        | 69.0      |
| <b>26 (MeSO<sub>2</sub>-Ph)</b>             | <b>82.3±2</b>      | 79.8                         | 77.3      | 77.4        | 77.4           | 77.3        | 79.2      |
| <b>27 (MeSO<sub>2</sub>-Bn)</b>             | <b>57.5±2</b>      | 58.1                         | 55.8      | 55.5        | 56.0           | 56.0        | 57.6      |

|                |   |        |        |        |        |        |        |
|----------------|---|--------|--------|--------|--------|--------|--------|
| R              | / | 0.9861 | 0.9848 | 0.9844 | 0.9842 | 0.9844 | 0.9814 |
| SD(kcal/mol)   | / | 1.7    | 1.7    | 1.7    | 1.8    | 1.8    | 1.8    |
| RMSD(kcal/mol) | / | 1.5    | 2.8    | 3.0    | 2.9    | 2.9    | 1.7    |

---



**Cartesian coordinates of all optimized geometries  
calculated at M06-2X/6-31G\* method**

**1 (Me-SH)**

|   |             |             |             |
|---|-------------|-------------|-------------|
| S | -0.66319800 | -0.08659400 | 0.00000300  |
| H | -0.89420700 | 1.23668200  | -0.00001500 |
| C | 1.15538200  | 0.01900300  | 0.00000400  |
| H | 1.52292800  | -1.00823200 | -0.00029800 |
| H | 1.52504600  | 0.52174700  | -0.89438900 |
| H | 1.52511600  | 0.52129100  | 0.89463600  |

**2 (Et-SH)**

|   |             |             |             |
|---|-------------|-------------|-------------|
| S | -1.10030600 | -0.23315900 | -0.00012000 |
| H | -1.90856500 | 0.84012300  | 0.00207900  |
| C | 0.48784800  | 0.67636000  | -0.00023800 |
| H | 0.54087500  | 1.31097300  | -0.88779400 |
| H | 0.54070100  | 1.31135500  | 0.88705100  |
| C | 1.62584500  | -0.33636100 | 0.00019100  |
| H | 1.57967900  | -0.97623100 | -0.88550000 |
| H | 2.59012900  | 0.17943500  | -0.00031700 |
| H | 1.57992400  | -0.97510600 | 0.88667800  |

**3 (nPr-SH)**

|   |             |             |             |
|---|-------------|-------------|-------------|
| C | 2.40306500  | 0.08189300  | 0.00010200  |
| H | 2.56875300  | 0.70478400  | 0.88531300  |
| H | 2.56881500  | 0.70563400  | -0.88450100 |
| H | 3.15882000  | -0.70838100 | -0.00025500 |
| C | 0.99367300  | -0.50548600 | -0.00023200 |
| H | 0.85303600  | -1.14334400 | -0.88054800 |
| H | 0.85291100  | -1.14396100 | 0.87962800  |
| C | -0.06671400 | 0.59072400  | 0.00003100  |
| H | 0.04381700  | 1.22016400  | -0.88782900 |
| H | 0.04401100  | 1.21999500  | 0.88799000  |
| S | -1.72743900 | -0.17659000 | 0.00012000  |
| H | -2.43128700 | 0.96775500  | -0.00111700 |

**4 (iPr-SH)**

|   |             |             |             |
|---|-------------|-------------|-------------|
| S | -1.39128600 | -0.00005300 | -0.01676400 |
| H | -1.24465600 | 0.00047100  | 1.32191100  |
| C | 0.40436800  | -0.00001000 | -0.39895600 |
| H | 0.41942500  | -0.00004700 | -1.49461000 |
| C | 1.08839100  | 1.26334500  | 0.11235500  |
| H | 1.05227800  | 1.30043000  | 1.20707100  |
| H | 2.14204700  | 1.27231500  | -0.18870700 |

|   |            |             |             |
|---|------------|-------------|-------------|
| H | 0.60471000 | 2.16253400  | -0.27546200 |
| C | 1.08847600 | -1.26329800 | 0.11241800  |
| H | 0.60481800 | -2.16253300 | -0.27531900 |
| H | 2.14211900 | -1.27223400 | -0.18869600 |
| H | 1.05241800 | -1.30031400 | 1.20713800  |

**5 (tBu-SH)**

|   |             |             |             |
|---|-------------|-------------|-------------|
| C | -0.34467000 | -0.00505800 | 0.00000100  |
| C | -0.83866000 | -0.72176300 | 1.25581500  |
| H | -0.48800200 | -1.75891700 | 1.28225700  |
| H | -0.48560400 | -0.21670900 | 2.15890000  |
| H | -1.93545600 | -0.73635700 | 1.26870700  |
| C | -0.83861900 | -0.72241600 | -1.25545500 |
| H | -1.93541400 | -0.73699600 | -1.26838400 |
| H | -0.48551700 | -0.21784900 | -2.15879400 |
| H | -0.48798600 | -1.75959500 | -1.28133100 |
| C | -0.81935500 | 1.44923600  | -0.00038700 |
| H | -0.46463100 | 1.98065800  | 0.88812500  |
| H | -0.46466500 | 1.98016700  | -0.88920400 |
| H | -1.91471200 | 1.47477200  | -0.00036700 |
| S | 1.50039500  | 0.07771300  | 0.00001400  |
| H | 1.70348700  | -1.25257900 | 0.00002400  |

**6 (cypen-SH)**

|   |             |             |             |
|---|-------------|-------------|-------------|
| S | -2.10293000 | -0.07810000 | -0.07595700 |
| H | -2.45805300 | 1.11663700  | 0.42645300  |
| C | -0.34457100 | 0.01794000  | 0.39871300  |
| C | 0.42869800  | -1.19593600 | -0.12382700 |
| C | 0.43557800  | 1.19037700  | -0.19573800 |
| H | -0.27822400 | 0.04395100  | 1.49266600  |
| C | 1.90653200  | -0.77301600 | 0.01194900  |
| H | 0.17011800  | -1.34885500 | -1.17880600 |
| H | 0.18960900  | -2.11608800 | 0.41544200  |
| C | 1.90380700  | 0.78167700  | 0.02164100  |
| H | 0.18089200  | 2.15076100  | 0.26278100  |
| H | 0.20364100  | 1.25598300  | -1.26507500 |
| H | 2.32901400  | -1.15934200 | 0.94394300  |
| H | 2.51116900  | -1.17856100 | -0.80309300 |
| H | 2.25850800  | 1.15399000  | 0.98762300  |
| H | 2.55994400  | 1.20486600  | -0.74304700 |

**7 (Ph-SH)**

|   |            |             |             |
|---|------------|-------------|-------------|
| S | 2.28232300 | -0.08295700 | -0.00491700 |
| H | 2.49427000 | 1.23962000  | 0.07016100  |

|   |             |             |             |
|---|-------------|-------------|-------------|
| C | 0.50660100  | -0.00001200 | 0.00074700  |
| C | -0.19842000 | -1.20610300 | 0.00280900  |
| C | -0.19293900 | 1.20774800  | -0.00217600 |
| C | -1.58862800 | -1.19921500 | 0.00110600  |
| H | 0.34251200  | -2.14816600 | 0.00764800  |
| C | -1.58461100 | 1.20471700  | -0.00118600 |
| H | 0.34564400  | 2.15123600  | -0.00617800 |
| C | -2.28883800 | 0.00452600  | -0.00019800 |
| H | -2.12632500 | -2.14246400 | 0.00284600  |
| H | -2.11837100 | 2.15029800  | -0.00234900 |
| H | -3.37388200 | 0.00681900  | -0.00007200 |

### 8 (Bn-SH)

|   |             |             |             |
|---|-------------|-------------|-------------|
| C | 1.46927200  | 0.00036700  | 0.89968200  |
| H | 1.69735300  | -0.88829600 | 1.49244800  |
| H | 1.69731500  | 0.88953200  | 1.49170600  |
| C | 0.02429300  | 0.00017600  | 0.47873000  |
| C | -0.64889600 | -1.20306700 | 0.26039700  |
| C | -0.64911200 | 1.20323600  | 0.26006600  |
| C | -1.97603500 | -1.20475900 | -0.15722900 |
| H | -0.12520000 | -2.14299900 | 0.41705200  |
| C | -1.97625500 | 1.20457700  | -0.15755100 |
| H | -0.12558500 | 2.14330400  | 0.41646000  |
| C | -2.64314300 | -0.00017900 | -0.36592700 |
| H | -2.48929100 | -2.14759100 | -0.31959700 |
| H | -2.48968000 | 2.14727300  | -0.32016700 |
| H | -3.67924800 | -0.00031500 | -0.69015700 |
| S | 2.51330000  | -0.00022900 | -0.61334000 |
| H | 3.70079100  | 0.00065200  | 0.01668200  |

### 9 (MeCO-SH)

|   |             |             |             |
|---|-------------|-------------|-------------|
| C | -1.40303100 | -0.93662400 | -0.00000100 |
| H | -1.23205700 | -1.55689700 | -0.88453300 |
| H | -2.42550200 | -0.55829400 | -0.00054300 |
| H | -1.23278200 | -1.55618300 | 0.88517800  |
| C | -0.45192900 | 0.23682300  | -0.00001700 |
| O | -0.78579500 | 1.38858200  | -0.00000100 |
| S | 1.28511800  | -0.26466100 | -0.00000400 |
| H | 1.74457300  | 0.99610800  | 0.00007600  |

### 10 (MeS-Me)

|   |            |            |             |
|---|------------|------------|-------------|
| S | 0.00000000 | 0.00000000 | 0.66702800  |
| C | 0.00000000 | 1.37250400 | -0.51685400 |
| H | 0.00000000 | 2.30074000 | 0.05756800  |

|   |             |             |             |
|---|-------------|-------------|-------------|
| H | 0.89332000  | 1.34789900  | -1.14633300 |
| H | -0.89332000 | 1.34789900  | -1.14633300 |
| C | 0.00000000  | -1.37250400 | -0.51685400 |
| H | 0.89332000  | -1.34789900 | -1.14633300 |
| H | 0.00000000  | -2.30074000 | 0.05756800  |
| H | -0.89332000 | -1.34789900 | -1.14633300 |

### 11 (MeS-Et)

|   |             |             |             |
|---|-------------|-------------|-------------|
| S | 0.71854900  | -0.68490100 | -0.21715000 |
| C | -0.94595200 | -0.45430500 | 0.48421400  |
| H | -0.84589600 | -0.18646000 | 1.54178400  |
| H | -1.40544800 | -1.44626600 | 0.44485200  |
| C | 1.42617300  | 0.94610600  | 0.14104300  |
| H | 2.48302200  | 0.90402200  | -0.12905100 |
| H | 0.94974000  | 1.73574100  | -0.44396800 |
| H | 1.34642700  | 1.17743900  | 1.20691800  |
| C | -1.80459600 | 0.56065000  | -0.25961500 |
| H | -1.90118500 | 0.28561000  | -1.31314900 |
| H | -2.80568300 | 0.60976200  | 0.18130100  |
| H | -1.37151600 | 1.56385500  | -0.20814100 |

### 12 (MeS-<sup>n</sup>Pr)

|   |             |             |             |
|---|-------------|-------------|-------------|
| C | -2.42547600 | 0.67890100  | -0.00003200 |
| H | -3.40803300 | 0.20324900  | -0.00008000 |
| H | -2.33618600 | 1.30250800  | -0.89337600 |
| H | -2.33627000 | 1.30250400  | 0.89332200  |
| S | -1.18039900 | -0.63916800 | 0.00002300  |
| C | 0.31485600  | 0.39729100  | 0.00003900  |
| H | 0.30417200  | 1.04213900  | 0.88671200  |
| H | 0.30412100  | 1.04224500  | -0.88655800 |
| C | 1.56635300  | -0.47542400 | -0.00005400 |
| H | 1.54991900  | -1.12848100 | -0.87997900 |
| H | 1.54994300  | -1.12864300 | 0.87975000  |
| C | 2.83847300  | 0.36995100  | 0.00000800  |
| H | 2.88083200  | 1.01355800  | 0.88481100  |
| H | 3.73185700  | -0.26044500 | -0.00008100 |
| H | 2.88079100  | 1.01375000  | -0.88465600 |

### 13 (<sup>n</sup>PrS-<sup>n</sup>Pr)

|   |            |             |             |
|---|------------|-------------|-------------|
| C | 3.90368400 | 0.59804000  | 0.00000000  |
| H | 3.88707500 | 1.24297100  | 0.88470900  |
| H | 3.88707600 | 1.24296600  | -0.88471300 |
| H | 4.85150200 | 0.05262200  | 0.00000200  |
| C | 2.71573400 | -0.36151900 | 0.00000200  |

|   |             |             |             |
|---|-------------|-------------|-------------|
| H | 2.76029400  | -1.01383800 | -0.87957600 |
| H | 2.76029400  | -1.01383400 | 0.87958300  |
| C | 1.38687100  | 0.38853900  | 0.00000000  |
| H | 1.31520700  | 1.02941700  | -0.88673300 |
| H | 1.31520500  | 1.02941700  | 0.88673300  |
| S | 0.00000000  | -0.79001000 | -0.00000100 |
| C | -1.38687100 | 0.38853900  | -0.00000200 |
| H | -1.31520700 | 1.02941500  | -0.88673600 |
| H | -1.31520500 | 1.02941800  | 0.88673000  |
| C | -2.71573400 | -0.36151900 | 0.00000200  |
| H | -2.76029300 | -1.01383300 | 0.87958300  |
| H | -2.76029500 | -1.01383800 | -0.87957600 |
| C | -3.90368400 | 0.59804000  | 0.00000000  |
| H | -3.88707700 | 1.24296600  | -0.88471200 |
| H | -4.85150200 | 0.05262200  | 0.00000300  |
| H | -3.88707500 | 1.24297100  | 0.88471000  |

#### 14(MeS-'Bu)

|   |             |             |             |
|---|-------------|-------------|-------------|
| C | -0.66497100 | 0.08042300  | -0.00033400 |
| C | -0.73754200 | 1.02246000  | -1.20134400 |
| H | -1.72278700 | 1.50338500  | -1.23409700 |
| H | 0.01326800  | 1.81637400  | -1.13556500 |
| H | -0.58620800 | 0.47704600  | -2.13745500 |
| C | -1.75370700 | -0.98973100 | -0.10869400 |
| H | -1.65875700 | -1.55414200 | -1.04140000 |
| H | -1.69993900 | -1.69212300 | 0.72931300  |
| H | -2.74008600 | -0.51237900 | -0.09258700 |
| C | -0.83343200 | 0.86209200  | 1.30238100  |
| H | -0.79572500 | 0.19320500  | 2.16661100  |
| H | -0.05645400 | 1.62403600  | 1.42004000  |
| H | -1.80180600 | 1.37760200  | 1.30251200  |
| S | 0.91786200  | -0.86832200 | 0.00269000  |
| C | 2.16273000  | 0.45089300  | 0.00195800  |
| H | 2.04609000  | 1.12072300  | 0.85726600  |
| H | 3.13275700  | -0.04367700 | 0.08452800  |
| H | 2.14539500  | 1.02628300  | -0.92601300 |

#### 15 (MeS-Ph)

|   |             |             |             |
|---|-------------|-------------|-------------|
| C | -2.68807400 | 0.86693600  | 0.00022700  |
| H | -3.75274200 | 0.62712600  | 0.00016000  |
| H | -2.45676500 | 1.44809500  | -0.89522100 |
| H | -2.45683900 | 1.44774400  | 0.89590700  |
| S | -1.82153200 | -0.72104200 | -0.00008400 |
| C | -0.11602500 | -0.23295900 | -0.00013500 |

|   |             |             |             |
|---|-------------|-------------|-------------|
| C | 0.82900100  | -1.26680900 | -0.00001000 |
| C | 0.32322800  | 1.09163900  | -0.00016400 |
| C | 2.18635500  | -0.97666900 | 0.00012900  |
| H | 0.49237400  | -2.30013600 | -0.00002600 |
| C | 1.68895500  | 1.37285500  | -0.00006400 |
| H | -0.38398500 | 1.91343800  | -0.00026000 |
| C | 2.62558900  | 0.34670400  | 0.00009700  |
| H | 2.90534500  | -1.79044400 | 0.00024300  |
| H | 2.01591200  | 2.40849500  | -0.00011400 |
| H | 3.68703700  | 0.57216700  | 0.00018800  |

#### 16 (MeS-Bn)

|   |             |             |             |
|---|-------------|-------------|-------------|
| C | -2.08811300 | 1.03827800  | -1.10069700 |
| H | -2.82051400 | 1.04758800  | -1.91003900 |
| H | -1.08234800 | 1.00432100  | -1.52630600 |
| H | -2.20598100 | 1.94868500  | -0.50622100 |
| S | -2.41585100 | -0.43656800 | -0.09957200 |
| C | -1.11864000 | -0.20854900 | 1.16793100  |
| H | -1.34741700 | 0.68725800  | 1.75425300  |
| C | 0.27453100  | -0.12605900 | 0.60137200  |
| C | 0.99031700  | 1.06984500  | 0.65536000  |
| C | 0.86392400  | -1.23827300 | -0.00713800 |
| C | 2.27618400  | 1.15470300  | 0.12375700  |
| H | 0.53714000  | 1.94205700  | 1.12117400  |
| C | 2.14683300  | -1.15813100 | -0.53511000 |
| H | 0.30228900  | -2.16715300 | -0.07063200 |
| C | 2.85788700  | 0.04012200  | -0.47042100 |
| H | 2.82074800  | 2.09276300  | 0.17444000  |
| H | 2.59484200  | -2.03144900 | -0.99950000 |
| H | 3.85950400  | 0.10298200  | -0.88447600 |
| H | -1.22219500 | -1.07358900 | 1.83014000  |

#### 17 (EtS-'Bu)

|   |             |             |             |
|---|-------------|-------------|-------------|
| C | 3.10404000  | -0.02800900 | 0.08278200  |
| H | 3.32882900  | -0.75399500 | -0.70400200 |
| H | 3.19946500  | -0.53211400 | 1.04809200  |
| H | 3.85080300  | 0.76976800  | 0.03311300  |
| C | 1.70258900  | 0.54811600  | -0.09335300 |
| H | 1.48042200  | 1.25439000  | 0.71279100  |
| H | 1.62989800  | 1.08080000  | -1.04588800 |
| S | 0.49697600  | -0.81788300 | -0.06110200 |
| C | -1.12145500 | 0.06653700  | 0.01411000  |
| C | -1.23729400 | 1.09638600  | -1.10919400 |
| H | -2.24125500 | 1.53801400  | -1.10197800 |

|   |             |             |             |
|---|-------------|-------------|-------------|
| H | -0.51707300 | 1.91090200  | -0.98285100 |
| H | -1.06929000 | 0.63191900  | -2.08548300 |
| C | -2.17386700 | -1.02934100 | -0.17099300 |
| H | -2.07916300 | -1.79996300 | 0.60090900  |
| H | -3.17592100 | -0.59194800 | -0.09583900 |
| H | -2.07575900 | -1.50618400 | -1.15078600 |
| C | -1.30702300 | 0.73787400  | 1.37562900  |
| H | -2.28751900 | 1.22833300  | 1.41846200  |
| H | -1.25045200 | 0.00230300  | 2.18272600  |
| H | -0.54653500 | 1.50452700  | 1.55448500  |

### 18 (EtS-COMe)

|   |             |             |             |
|---|-------------|-------------|-------------|
| C | 2.84911500  | -0.06794200 | -0.02996500 |
| H | 2.98433400  | -0.62534900 | -0.96092700 |
| H | 3.03387300  | -0.74840900 | 0.80602200  |
| H | 3.60220800  | 0.72424800  | 0.00507200  |
| C | 1.45602900  | 0.54223700  | 0.04904000  |
| H | 1.31365100  | 1.10967500  | 0.97149900  |
| H | 1.25706200  | 1.21582900  | -0.78720300 |
| S | 0.20093700  | -0.77802900 | 0.00286900  |
| C | -1.26076500 | 0.24876900  | -0.01559900 |
| O | -1.20143100 | 1.45254400  | -0.01881800 |
| C | -2.56362200 | -0.51991100 | 0.00018900  |
| H | -2.42646100 | -1.57791100 | -0.23010700 |
| H | -3.00524700 | -0.42566700 | 0.99685100  |
| H | -3.24750900 | -0.06322800 | -0.71855500 |

### 19 (MeSS-Me)

|   |             |             |             |
|---|-------------|-------------|-------------|
| C | -1.81346100 | 0.80683800  | 0.38738100  |
| H | -2.81295400 | 0.84167200  | -0.05400900 |
| H | -1.33321400 | 1.77809500  | 0.25498300  |
| H | -1.89319400 | 0.56896400  | 1.44877500  |
| S | -0.90508300 | -0.50186600 | -0.49343000 |
| S | 0.90511000  | -0.50188700 | 0.49341000  |
| C | 1.81341500  | 0.80689400  | -0.38735400 |
| H | 1.33296200  | 1.77806100  | -0.25509600 |
| H | 2.81281800  | 0.84187000  | 0.05423600  |
| H | 1.89342300  | 0.56899100  | -1.44872300 |

### 20 (MeSS-Et)

|   |             |            |             |
|---|-------------|------------|-------------|
| C | -2.13564500 | 1.04127400 | 0.36788200  |
| H | -3.13433800 | 1.20384600 | -0.04596700 |
| H | -1.51576200 | 1.91389600 | 0.15444200  |
| H | -2.20901800 | 0.88739400 | 1.44504100  |

|   |             |             |             |
|---|-------------|-------------|-------------|
| S | -1.47375900 | -0.44750600 | -0.44574900 |
| S | 0.35232100  | -0.66060900 | 0.48310100  |
| C | 1.42287400  | 0.43959300  | -0.51427600 |
| H | 1.03319900  | 1.45989000  | -0.45907000 |
| H | 1.38282200  | 0.10809200  | -1.55434200 |
| C | 2.84192400  | 0.36849400  | 0.03714400  |
| H | 3.23042700  | -0.65269900 | -0.01094300 |
| H | 3.50274600  | 1.01253500  | -0.54979900 |
| H | 2.87801500  | 0.70072300  | 1.07851400  |

### 21 (MeSS-iPr)

|   |             |             |             |
|---|-------------|-------------|-------------|
| C | -2.38853700 | -0.46260900 | 0.98284600  |
| H | -3.33003800 | 0.03446200  | 1.23119000  |
| H | -1.75004300 | -0.48018600 | 1.86790200  |
| H | -2.59218900 | -1.48026600 | 0.64746000  |
| S | -1.62643100 | 0.50697400  | -0.35675900 |
| S | 0.05797400  | -0.60400200 | -0.77033300 |
| C | 1.28972200  | 0.03632900  | 0.44210900  |
| H | 0.84844200  | -0.08083200 | 1.43797300  |
| C | 1.62969000  | 1.49769400  | 0.19015200  |
| H | 0.73578100  | 2.12550300  | 0.23426500  |
| H | 2.33717100  | 1.85333100  | 0.94768200  |
| H | 2.08872500  | 1.61536000  | -0.79657700 |
| C | 2.51381600  | -0.86728700 | 0.31826300  |
| H | 3.28318100  | -0.54263700 | 1.02608100  |
| H | 2.26938600  | -1.91219400 | 0.52750200  |
| H | 2.93675100  | -0.80486000 | -0.69022900 |

### 22 (MeSO<sub>2</sub>-Me)

|   |             |             |             |
|---|-------------|-------------|-------------|
| C | -1.40443200 | 0.91564900  | -0.00001500 |
| H | -1.38518600 | 1.52798000  | -0.90257600 |
| H | -1.38519700 | 1.52800100  | 0.90253100  |
| H | -2.28969500 | 0.27660200  | -0.00001300 |
| S | 0.00000000  | -0.19179700 | 0.00000500  |
| O | -0.00000300 | -0.91149100 | 1.26899700  |
| O | 0.00000300  | -0.91153300 | -1.26897400 |
| C | 1.40443200  | 0.91564900  | -0.00001100 |
| H | 1.38519300  | 1.52797800  | -0.90257300 |
| H | 1.38519000  | 1.52800300  | 0.90253400  |
| H | 2.28969500  | 0.27660200  | -0.00000100 |

### 23 (MeSO<sub>2</sub>-Et)

|   |             |             |             |
|---|-------------|-------------|-------------|
| C | -1.10099000 | -0.55350100 | -0.63877300 |
| H | -1.16018900 | -1.63925800 | -0.51152400 |

|   |             |             |             |
|---|-------------|-------------|-------------|
| H | -1.02912700 | -0.34366800 | -1.70987200 |
| S | 0.49953900  | -0.15164300 | 0.07573000  |
| O | 0.38412200  | -0.26291100 | 1.52773200  |
| O | 1.50621200  | -0.91729100 | -0.65396900 |
| C | 0.74229200  | 1.57820800  | -0.31756800 |
| H | 0.72865500  | 1.70953600  | -1.40051600 |
| H | -0.02533800 | 2.17880400  | 0.17183500  |
| H | 1.72664300  | 1.83555500  | 0.07870500  |
| C | -2.25718900 | 0.16153200  | 0.04429600  |
| H | -2.22913000 | 1.24024700  | -0.13466200 |
| H | -3.20605600 | -0.21532600 | -0.34516900 |
| H | -2.22542400 | -0.01542000 | 1.12170100  |

#### 24 (MeSO<sub>2</sub>-<sup>i</sup>Pr)

|   |             |             |             |
|---|-------------|-------------|-------------|
| C | 1.03658100  | 0.12697700  | -0.50984300 |
| H | 0.93565200  | 0.16424300  | -1.60061200 |
| S | -0.63829800 | -0.20159000 | 0.09671000  |
| O | -1.10381300 | -1.43187400 | -0.54166700 |
| O | -0.62122100 | -0.08388500 | 1.55478700  |
| C | -1.63559300 | 1.14020500  | -0.54753100 |
| H | -1.32850400 | 2.08319300  | -0.09506500 |
| H | -1.54858200 | 1.16589700  | -1.63496600 |
| H | -2.66224700 | 0.90318900  | -0.26128400 |
| C | 1.56843100  | 1.44079600  | 0.04949600  |
| H | 1.53842700  | 1.41912000  | 1.14257300  |
| H | 2.60647300  | 1.57458200  | -0.26853800 |
| H | 0.99931400  | 2.30665000  | -0.30078800 |
| C | 1.88992000  | -1.07160800 | -0.09958800 |
| H | 1.47493000  | -2.00164200 | -0.49317600 |
| H | 2.90400200  | -0.94130900 | -0.48685000 |
| H | 1.93753400  | -1.14063400 | 0.99118100  |

#### 25 (MeSO<sub>2</sub>-<sup>n</sup>Bu)

|   |             |             |             |
|---|-------------|-------------|-------------|
| C | -0.15211900 | 0.77706700  | 0.00000100  |
| H | -0.12940800 | 1.40844800  | 0.89413600  |
| S | 1.35852300  | -0.19473800 | 0.00000200  |
| O | 1.42868600  | -0.91691600 | 1.26847500  |
| O | 1.42866800  | -0.91694700 | -1.26845400 |
| C | 2.65869200  | 1.03568500  | -0.00002200 |
| H | 2.58226200  | 1.64336800  | -0.90277600 |
| H | 2.58227600  | 1.64338800  | 0.90272000  |
| H | 3.59839200  | 0.47966600  | -0.00002300 |
| H | -0.12940700 | 1.40845100  | -0.89413100 |
| C | -1.36019100 | -0.15568300 | -0.00000200 |

|   |             |             |             |
|---|-------------|-------------|-------------|
| H | -1.30652100 | -0.80427600 | 0.88188100  |
| H | -1.30652500 | -0.80426400 | -0.88189400 |
| C | -2.67399300 | 0.62509300  | 0.00000700  |
| H | -2.70754200 | 1.28062000  | -0.87941600 |
| H | -2.70754300 | 1.28059700  | 0.87944600  |
| C | -3.88646800 | -0.30208600 | -0.00000600 |
| H | -3.88277000 | -0.94748400 | 0.88409900  |
| H | -4.82116800 | 0.26519700  | 0.00000400  |
| H | -3.88277200 | -0.94745700 | -0.88413000 |

#### 26 (MeSO<sub>2</sub>-Ph)

|   |             |             |             |
|---|-------------|-------------|-------------|
| S | -1.46501700 | 0.00004100  | -0.17204600 |
| O | -1.88442300 | 1.27283400  | -0.75112700 |
| O | -1.88454800 | -1.27256600 | -0.75142800 |
| C | -1.96403900 | -0.00024800 | 1.54662800  |
| H | -1.58076100 | -0.90161600 | 2.02664800  |
| H | -1.58007400 | 0.90047800  | 2.02731400  |
| H | -3.05613800 | 0.00014300  | 1.54968700  |
| C | 0.31684200  | -0.00010100 | -0.08289500 |
| C | 0.99003900  | -1.21735900 | -0.04906500 |
| C | 0.98987500  | 1.21724700  | -0.04896400 |
| C | 2.37905500  | -1.21040300 | 0.03665600  |
| H | 0.42770000  | -2.14409500 | -0.11229500 |
| C | 2.37888900  | 1.21047200  | 0.03678000  |
| H | 0.42738900  | 2.14389700  | -0.11221100 |
| C | 3.06829500  | 0.00007900  | 0.08271100  |
| H | 2.92419800  | -2.14852500 | 0.05813000  |
| H | 2.92391700  | 2.14865700  | 0.05832800  |
| H | 4.15206900  | 0.00014800  | 0.14645700  |

#### 27 (MeSO<sub>2</sub>-Bn)

|   |             |             |             |
|---|-------------|-------------|-------------|
| S | 1.72976100  | 0.01644600  | -0.25533900 |
| O | 1.55249300  | -1.18335500 | -1.06716300 |
| O | 1.60009300  | 1.34605900  | -0.84363100 |
| C | 3.34245000  | -0.08023400 | 0.51626800  |
| H | 3.46492600  | 0.75431000  | 1.20814600  |
| H | 3.44538200  | -1.04100800 | 1.02236900  |
| H | 4.06860100  | -0.00370300 | -0.29557800 |
| C | 0.58944400  | -0.08496800 | 1.14868400  |
| H | 0.81398100  | -1.02169900 | 1.66681800  |
| H | 0.82347900  | 0.76364900  | 1.79798800  |
| C | -0.82258300 | -0.04253700 | 0.63976800  |
| C | -1.44084100 | 1.18395600  | 0.39051200  |
| C | -1.49963900 | -1.22788000 | 0.35089600  |

|   |             |             |             |
|---|-------------|-------------|-------------|
| C | -2.73509200 | 1.22288800  | -0.11677300 |
| H | -0.89884500 | 2.10534100  | 0.58467800  |
| C | -2.79444100 | -1.18781300 | -0.15526800 |
| H | -1.00593200 | -2.18145700 | 0.51659100  |
| C | -3.41488900 | 0.03738800  | -0.38594200 |
| H | -3.21167500 | 2.17983100  | -0.30462900 |
| H | -3.31714700 | -2.11365100 | -0.37373700 |
| H | -4.42608700 | 0.06882500  | -0.77973300 |

### TS-S1PdCl

|    |             |             |             |
|----|-------------|-------------|-------------|
| C  | 2.90637600  | -1.25308500 | -1.10998100 |
| C  | 1.66145500  | -0.63993600 | -1.21561700 |
| C  | 1.09647500  | -0.05517000 | -0.07625600 |
| C  | 1.78992400  | 0.00186100  | 1.13525200  |
| C  | 3.02992800  | -0.62343800 | 1.23116100  |
| C  | 3.58105600  | -1.24800300 | 0.11188800  |
| H  | 3.35175800  | -1.72901200 | -1.97756200 |
| H  | 1.12591800  | -0.63038700 | -2.16275700 |
| H  | 1.36458900  | 0.53729400  | 1.98224200  |
| H  | 3.57307200  | -0.60874800 | 2.17045900  |
| H  | 4.55521900  | -1.72056100 | 0.18817700  |
| S  | 0.23946300  | 2.06698500  | -0.43490700 |
| O  | 0.26463400  | 2.65159400  | 0.89199200  |
| O  | -1.09114200 | 1.50005800  | -0.85985900 |
| Pd | -0.93461200 | -0.39553100 | 0.03733200  |
| Cl | -3.09347300 | -1.23720900 | 0.25440700  |

### TS-S2PdCl

|    |             |             |             |
|----|-------------|-------------|-------------|
| C  | -2.78109300 | -0.73259100 | 1.17714800  |
| C  | -1.45154100 | -0.33692700 | 1.24530000  |
| C  | -0.80018100 | 0.10743200  | 0.08565700  |
| C  | -1.49424300 | 0.23655300  | -1.12346600 |
| C  | -2.81982300 | -0.16950000 | -1.20223600 |
| C  | -3.43415600 | -0.64767000 | -0.04894900 |
| H  | -3.32051900 | -1.09543000 | 2.04484900  |
| H  | -0.91689300 | -0.38620000 | 2.19154000  |
| H  | -0.99819900 | 0.66419600  | -1.99279200 |
| H  | -3.38955600 | -0.10598100 | -2.12250200 |
| S  | 0.29238800  | 2.15116600  | 0.40870700  |
| O  | 0.33050300  | 2.70419300  | -0.93042300 |
| O  | 1.53509500  | 1.41910900  | 0.83798000  |
| Pd | 1.16504700  | -0.46660200 | -0.02752800 |
| Cl | 3.20662400  | -1.56411300 | -0.25909100 |
| F  | -4.71070600 | -1.01909400 | -0.11674900 |

### TS-S3PdCl

|    |             |             |             |
|----|-------------|-------------|-------------|
| C  | -2.75951100 | -0.67715200 | 1.17472400  |
| C  | -1.42413500 | -0.29452100 | 1.24849500  |
| C  | -0.77431300 | 0.13854600  | 0.08768600  |
| C  | -1.47255900 | 0.26861600  | -1.11793200 |
| C  | -2.80106000 | -0.12924500 | -1.17657200 |
| C  | -3.46007000 | -0.60595200 | -0.03437500 |
| H  | -3.26839200 | -1.03003800 | 2.06735300  |
| H  | -0.88799300 | -0.34508100 | 2.19413600  |
| H  | -0.97750900 | 0.68847900  | -1.99177200 |
| H  | -3.34561700 | -0.05328300 | -2.11419200 |
| S  | 0.34680300  | 2.15141200  | 0.40117900  |
| O  | 0.39793400  | 2.70355900  | -0.93873600 |
| O  | 1.58004900  | 1.40501600  | 0.83678000  |
| Pd | 1.17837800  | -0.47369600 | -0.02896100 |
| Cl | 3.19731500  | -1.62233600 | -0.25803900 |
| C  | -4.90803600 | -1.00833000 | -0.11607300 |
| H  | -5.52870900 | -0.16225800 | -0.42823900 |
| H  | -5.04694300 | -1.80488300 | -0.85387900 |
| H  | -5.27915700 | -1.36615200 | 0.84653600  |

### TS-S4PdCl

|    |             |             |             |
|----|-------------|-------------|-------------|
| C  | 2.06567000  | -0.32938200 | -0.85664200 |
| C  | 0.69465000  | -0.18957400 | -1.01503300 |
| C  | -0.10770600 | 0.26707900  | 0.03959200  |
| C  | 0.48369100  | 0.66548600  | 1.24579800  |
| C  | 1.84890400  | 0.52631600  | 1.41354300  |
| C  | 2.65232900  | 0.02645500  | 0.37151800  |
| H  | 2.68394800  | -0.69799000 | -1.66185600 |
| H  | 0.24077100  | -0.45449700 | -1.96826700 |
| H  | -0.12459300 | 1.09929000  | 2.03693700  |
| H  | 2.31104300  | 0.82568300  | 2.35092900  |
| S  | -1.39365900 | 2.11819400  | -0.61349100 |
| O  | -1.63924300 | 2.79643900  | 0.64471600  |
| O  | -2.47459200 | 1.16995600  | -1.04978800 |
| Pd | -1.96340900 | -0.55466900 | 0.07227900  |
| Cl | -3.84001600 | -1.94187900 | 0.27255100  |
| C  | 6.40669200  | -0.42890500 | 0.37516900  |
| H  | 7.11963200  | -0.83520400 | -0.34038600 |
| H  | 6.68085100  | 0.60437400  | 0.61049000  |
| H  | 6.44439300  | -1.01297600 | 1.29963600  |
| N  | 4.02008800  | -0.06725200 | 0.61766500  |
| H  | 4.31472300  | 0.21109900  | 1.54449500  |
| C  | 5.02666400  | -0.48049800 | -0.24540100 |

O 4.82119500 -0.83830300 -1.38358400

### TS-S5PdCl

C -2.13171900 1.16022300 -0.49999800  
H -1.95410900 1.41049400 -1.54653500  
H -1.42905600 1.70417100 0.15926300  
H -3.13523700 1.45128800 -0.18430200  
S -1.97288400 -0.65901300 -0.25404600  
O -0.49884200 -0.79992500 -0.84358800  
O -1.96033400 -0.80126900 1.22155800  
Pd 0.58956000 0.46675900 0.18069900  
Cl 2.55461900 -0.56732000 -0.15880000

### TS-S1CuOAc

C 2.38131700 -2.30312600 -0.87270700  
C 1.21962500 -1.54291300 -0.89339700  
C 0.95780400 -0.55298900 0.07733800  
C 1.94463100 -0.36383000 1.06396400  
C 3.11209900 -1.12552500 1.10360000  
C 3.33090100 -2.09568800 0.13121500  
H 2.55106700 -3.06424000 -1.62891300  
H 0.48077000 -1.73627500 -1.66922500  
H 1.81229500 0.41371000 1.81800300  
H 3.84999100 -0.95660600 1.88224700  
H 4.24164200 -2.68730100 0.14784600  
S 1.11815300 1.94929800 -0.68891000  
O 2.20418500 2.66206700 -0.05823900  
O -0.19263900 2.10310900 0.00281000  
Cu -0.88149900 0.18878400 0.20749400  
O -2.11591700 -1.29918300 -0.35014400  
O -2.78696300 0.58235100 0.52827400  
C -3.06732800 -0.56246400 0.04893300  
C -4.48761800 -1.03748400 -0.04336000  
H -5.17349800 -0.27961300 0.33205200  
H -4.71704200 -1.27542000 -1.08494800  
H -4.59011000 -1.96037700 0.53306300

### TS-S2CuOAc

C 2.50958500 -1.68908900 -0.92428600  
C 1.22296500 -1.17032000 -0.93456800  
C 0.76278800 -0.26558900 0.04805100  
C 1.69104900 0.09648700 1.04476200  
C 2.98711700 -0.41169500 1.08928500  
C 3.37080600 -1.29814300 0.09647600

H 2.86073300 -2.38997300 -1.67413900  
H 0.54386300 -1.49679600 -1.71966100  
H 1.40724900 0.81910000 1.81076600  
H 3.69638100 -0.13006000 1.85971600  
S 0.46586000 2.24337800 -0.67728900  
O 1.39268400 3.12329800 -0.00461800  
O -0.85947700 2.12788400 -0.00669000  
Cu -1.18200300 0.11803200 0.18603000  
O -2.13160500 -1.57198300 -0.36837700  
O -3.11596500 0.15168100 0.53799200  
C -3.19217800 -1.02493100 0.05417400  
C -4.51412200 -1.73236100 0.00479900  
H -4.86350100 -1.89753800 1.02746700  
H -5.24645900 -1.09281600 -0.49279000  
H -4.42030700 -2.68465400 -0.51489700  
F 4.61479800 -1.79082400 0.11185100

### TS-S3CuOAc

C 2.53444500 -1.61977700 -0.91296500  
C 1.23130700 -1.15073400 -0.93471500  
C 0.73476500 -0.26693400 0.04994400  
C 1.65011700 0.11709200 1.04788600  
C 2.96146400 -0.35628200 1.08345900  
C 3.42327500 -1.22969900 0.10164700  
H 2.88075400 -2.30487200 -1.68417600  
H 0.56728400 -1.49456100 -1.72593900  
H 1.34377600 0.82656300 1.81838100  
H 3.63457800 -0.03625400 1.87495400  
S 0.43354100 2.23457800 -0.66985000  
O 1.33706000 3.14841600 -0.00956700  
O -0.89425900 2.10890800 -0.00445500  
Cu -1.21116000 0.09739800 0.17925000  
O -2.15949400 -1.59944300 -0.36689600  
O -3.14767500 0.12688800 0.53158000  
C -3.22011200 -1.05226700 0.05385100  
C -4.54089000 -1.76330700 0.00911300  
H -5.27487300 -1.12853400 -0.49217800  
H -4.44508900 -2.71844500 -0.50503400  
H -4.88977900 -1.92328500 1.03277100  
C 4.83722200 -1.74730900 0.11247300  
H 4.85174500 -2.83862900 0.20299700  
H 5.35588400 -1.49215500 -0.81749500  
H 5.40808400 -1.33045700 0.94561200

**TS-S4CuOAc**

|    |             |             |             |   |             |            |             |
|----|-------------|-------------|-------------|---|-------------|------------|-------------|
| C  | 2.04475800  | -0.89274600 | -0.59147500 | H | -0.21661100 | 2.53961700 | 0.60260100  |
| C  | 0.66413800  | -0.78609600 | -0.66452200 | H | -1.19689400 | 2.31937100 | -0.83233700 |
| C  | -0.10330800 | 0.03134500  | 0.19347700  | H | -1.85765500 | 1.96607500 | 0.76850500  |
| C  | 0.63428900  | 0.75423300  | 1.15468100  |   |             |            |             |
| C  | 2.01504900  | 0.66545500  | 1.26122800  |   |             |            |             |
| C  | 2.73523800  | -0.15655400 | 0.38728500  |   |             |            |             |
| H  | 2.59524800  | -1.53264500 | -1.26605500 |   |             |            |             |
| H  | 0.15495700  | -1.38594100 | -1.41687900 |   |             |            |             |
| H  | 0.11990900  | 1.43055100  | 1.83867900  |   |             |            |             |
| H  | 2.54374500  | 1.24187100  | 2.01746200  |   |             |            |             |
| S  | -0.88401800 | 2.34462300  | -0.83963000 |   |             |            |             |
| O  | -0.26405900 | 3.51155500  | -0.25413900 |   |             |            |             |
| O  | -2.18345300 | 1.96940500  | -0.21713100 |   |             |            |             |
| Cu | -2.07952400 | -0.04273900 | 0.17306400  |   |             |            |             |
| O  | -2.60676600 | -1.94907600 | -0.23815400 |   |             |            |             |
| O  | -4.00216000 | -0.39605400 | 0.39848600  |   |             |            |             |
| C  | -3.78870800 | -1.60416700 | 0.05253600  |   |             |            |             |
| C  | -4.92481000 | -2.58373600 | 0.00956800  |   |             |            |             |
| H  | -5.29487200 | -2.73770900 | 1.02684000  |   |             |            |             |
| H  | -5.74347100 | -2.16215700 | -0.57752600 |   |             |            |             |
| H  | -4.59704200 | -3.53239500 | -0.41290400 |   |             |            |             |
| N  | 4.12711000  | -0.19364300 | 0.54180400  |   |             |            |             |
| C  | 5.06302000  | -0.87967200 | -0.20605000 |   |             |            |             |
| H  | 4.48805600  | 0.36235500  | 1.30584100  |   |             |            |             |
| O  | 4.78766000  | -1.57871800 | -1.15832600 |   |             |            |             |
| C  | 6.48465600  | -0.68842400 | 0.28881500  |   |             |            |             |
| H  | 6.73175800  | 0.37223000  | 0.39340600  |   |             |            |             |
| H  | 6.61383000  | -1.16802200 | 1.26420600  |   |             |            |             |
| H  | 7.16145800  | -1.15061200 | -0.42809400 |   |             |            |             |

**TS-S5CuOAc**

|    |             |             |             |
|----|-------------|-------------|-------------|
| S  | -2.46126000 | -0.33799200 | -0.43513500 |
| O  | -3.49618600 | -0.39871400 | 0.56624100  |
| O  | -1.27929100 | -1.19258300 | -0.18039000 |
| Cu | 0.20009400  | 0.23380000  | 0.09057000  |
| O  | 2.03725900  | 0.95816400  | -0.33804300 |
| O  | 1.64195000  | -1.06545200 | 0.37470000  |
| C  | 2.47711600  | -0.17940200 | -0.00420400 |
| C  | 3.94214600  | -0.49998000 | -0.04458500 |
| H  | 4.27033200  | -0.79020000 | 0.95655800  |
| H  | 4.10142700  | -1.35758700 | -0.70273400 |
| H  | 4.51315100  | 0.35811300  | -0.39565400 |
| C  | -0.96362600 | 1.87620900  | 0.14189200  |
